# Supplementary material for: A transcriptome-based single-cell biological age model and resource for tissue-specific aging measures
Source: HighWire-hosted journal article supplement (doi:10.1101/gr.277491.122), 2023-07-31
Supplement: Supplemental_Table_S1.xlsx [file Supplemental_Table_S1.xlsx]

## Sheet: Legend
Table S1. Aging gene sets used for each dataset.
Aging gene sets used for each dataset to compute the SCALE score were displayed on separate pages according to whether they were up- or down- regulated during the aging process.

## Sheet: Supplemental_Table_S1
gene	tissue	direction
Zbtb38	droplet-Bladder	down-regulated
Zbtb16	droplet-Bladder	down-regulated
Tril	droplet-Bladder	down-regulated
Cntn4	droplet-Bladder	down-regulated
Gfm2	droplet-Bladder	down-regulated
Nfatc4	droplet-Bladder	down-regulated
Necab1	droplet-Bladder	down-regulated
Erdr1	droplet-Bladder	down-regulated
Slc36a1	droplet-Bladder	down-regulated
Synj2	droplet-Bladder	down-regulated
Fam123b	droplet-Bladder	down-regulated
Dock10	droplet-Bladder	down-regulated
Arhgap20	droplet-Bladder	down-regulated
Apaf1	droplet-Bladder	down-regulated
Gtf2h3	droplet-Bladder	down-regulated
Lrp4	droplet-Bladder	down-regulated
Fam73b	droplet-Bladder	down-regulated
Zcchc3	droplet-Bladder	down-regulated
Ccnd1	droplet-Bladder	down-regulated
Tmem181c-ps	droplet-Bladder	down-regulated
Plcl1	droplet-Bladder	down-regulated
Xaf1	droplet-Bladder	down-regulated
Tyk2	droplet-Bladder	down-regulated
Mtg1	droplet-Bladder	down-regulated
Tspan11	droplet-Bladder	down-regulated
Prkdc	droplet-Bladder	down-regulated
2210408F21Rik	droplet-Bladder	down-regulated
Fem1c	droplet-Bladder	down-regulated
Ranbp6	droplet-Bladder	down-regulated
Ehbp1	droplet-Bladder	down-regulated
Rel	droplet-Bladder	down-regulated
Dbp	droplet-Bladder	down-regulated
Rnaset2b	droplet-Bladder	down-regulated
Evc2	droplet-Bladder	down-regulated
Rab27a	droplet-Bladder	down-regulated
5730455O13Rik	droplet-Bladder	down-regulated
Ulk2	droplet-Bladder	down-regulated
Tmem51	droplet-Bladder	down-regulated
Entpd1	droplet-Bladder	down-regulated
Hdac6	droplet-Bladder	down-regulated
Hist2h2aa1	droplet-Bladder	down-regulated
Lpcat2	droplet-Bladder	down-regulated
Gpr133	droplet-Bladder	down-regulated
Ndn	droplet-Bladder	down-regulated
Sox15	droplet-Bladder	down-regulated
Bcap29	droplet-Bladder	down-regulated
Mnat1	droplet-Bladder	down-regulated
Eln	droplet-Bladder	down-regulated
Chd2	droplet-Bladder	down-regulated
Xrn1	droplet-Bladder	down-regulated
Fam19a5	droplet-Bladder	up-regulated
Slit3	droplet-Bladder	up-regulated
Rnmtl1	droplet-Bladder	up-regulated
Pde8a	droplet-Bladder	up-regulated
Vps33a	droplet-Bladder	up-regulated
Cdh2	droplet-Bladder	up-regulated
Slc35b3	droplet-Bladder	up-regulated
Pla1a	droplet-Bladder	up-regulated
Fbln2	droplet-Bladder	up-regulated
Gm889	droplet-Bladder	up-regulated
Serpine2	droplet-Bladder	up-regulated
Mphosph9	droplet-Bladder	up-regulated
Zc3h6	droplet-Bladder	up-regulated
2310030G06Rik	droplet-Bladder	up-regulated
Gipc2	droplet-Bladder	up-regulated
Abcg1	droplet-Bladder	up-regulated
Scd1	droplet-Bladder	up-regulated
Nup85	droplet-Bladder	up-regulated
Rbm38	droplet-Bladder	up-regulated
Ric3	droplet-Bladder	up-regulated
Tnfrsf1b	droplet-Bladder	up-regulated
Dact1	droplet-Bladder	up-regulated
Tfap2a	droplet-Bladder	up-regulated
Polr1b	droplet-Bladder	up-regulated
Ceacam1	droplet-Bladder	up-regulated
Ccnt1	droplet-Bladder	up-regulated
Ddit3	droplet-Bladder	up-regulated
Fas	droplet-Bladder	up-regulated
Cyp51	droplet-Bladder	up-regulated
D730005E14Rik	droplet-Bladder	up-regulated
Cse1l	droplet-Bladder	up-regulated
Rnf185	droplet-Bladder	up-regulated
Gas1	droplet-Bladder	up-regulated
Bmi1	droplet-Bladder	up-regulated
Prkar2b	droplet-Bladder	up-regulated
Sirt1	droplet-Bladder	up-regulated
Cdkn1c	droplet-Bladder	up-regulated
Wdr6	droplet-Bladder	up-regulated
2700038G22Rik	droplet-Bladder	up-regulated
Tmem100	droplet-Bladder	up-regulated
Samd4	droplet-Bladder	up-regulated
Rtn4rl1	droplet-Bladder	up-regulated
Rbm3	droplet-Bladder	up-regulated
Rcl1	droplet-Bladder	up-regulated
Gpnmb	droplet-Bladder	up-regulated
Cirbp	droplet-Bladder	up-regulated
Ing1	droplet-Bladder	up-regulated
2900060B14Rik	droplet-Bladder	up-regulated
D4Wsu53e	droplet-Bladder	up-regulated
Igf1	droplet-Bladder	up-regulated
Tsix	droplet-Fat	down-regulated
Spef1	droplet-Fat	down-regulated
Zbtb16	droplet-Fat	down-regulated
Nox4	droplet-Fat	down-regulated
Zc3h12d	droplet-Fat	down-regulated
Tgif2	droplet-Fat	down-regulated
Map3k6	droplet-Fat	down-regulated
Tbc1d22b	droplet-Fat	down-regulated
Ddx19b	droplet-Fat	down-regulated
Zrsr1	droplet-Fat	down-regulated
Sox18	droplet-Fat	down-regulated
Ppp3cc	droplet-Fat	down-regulated
Cd28	droplet-Fat	down-regulated
Gm6548	droplet-Fat	down-regulated
Fbxw17	droplet-Fat	down-regulated
Ctsw	droplet-Fat	down-regulated
Ercc4	droplet-Fat	down-regulated
Tysnd1	droplet-Fat	down-regulated
Tlr3	droplet-Fat	down-regulated
Gm8369	droplet-Fat	down-regulated
Siglece	droplet-Fat	down-regulated
Pcdh7	droplet-Fat	down-regulated
Ripply3	droplet-Fat	down-regulated
Eml2	droplet-Fat	down-regulated
Gfm1	droplet-Fat	down-regulated
Tada2a	droplet-Fat	down-regulated
Rrp36	droplet-Fat	down-regulated
Gm7120	droplet-Fat	down-regulated
Tbkbp1	droplet-Fat	down-regulated
Ces2g	droplet-Fat	down-regulated
Ppp1r16b	droplet-Fat	down-regulated
Aacs	droplet-Fat	down-regulated
Vldlr	droplet-Fat	down-regulated
D19Wsu162e	droplet-Fat	down-regulated
Ism1	droplet-Fat	down-regulated
Lclat1	droplet-Fat	down-regulated
Nptn	droplet-Fat	down-regulated
1110067D22Rik	droplet-Fat	down-regulated
Alg12	droplet-Fat	down-regulated
Tcf21	droplet-Fat	down-regulated
Xist	droplet-Fat	down-regulated
Kti12	droplet-Fat	down-regulated
Pydc3	droplet-Fat	down-regulated
Jak2	droplet-Fat	down-regulated
Rusc2	droplet-Fat	down-regulated
Atp8b1	droplet-Fat	down-regulated
Sult5a1	droplet-Fat	down-regulated
Agtpbp1	droplet-Fat	down-regulated
Ndor1	droplet-Fat	down-regulated
Jdp2	droplet-Fat	down-regulated
Atp6v0e2	droplet-Fat	up-regulated
Heg1	droplet-Fat	up-regulated
Bbs9	droplet-Fat	up-regulated
Mid1	droplet-Fat	up-regulated
Slc25a44	droplet-Fat	up-regulated
P2ry10	droplet-Fat	up-regulated
Rnf121	droplet-Fat	up-regulated
Cyp27a1	droplet-Fat	up-regulated
Clic5	droplet-Fat	up-regulated
Ddx3y	droplet-Fat	up-regulated
Eya2	droplet-Fat	up-regulated
Pik3cb	droplet-Fat	up-regulated
E130203B14Rik	droplet-Fat	up-regulated
Kctd6	droplet-Fat	up-regulated
Dact1	droplet-Fat	up-regulated
Gbp4	droplet-Fat	up-regulated
Thra	droplet-Fat	up-regulated
Slc25a23	droplet-Fat	up-regulated
Pisd-ps1	droplet-Fat	up-regulated
Glt8d2	droplet-Fat	up-regulated
Ubxn2a	droplet-Fat	up-regulated
Myo18a	droplet-Fat	up-regulated
Faim3	droplet-Fat	up-regulated
Chordc1	droplet-Fat	up-regulated
Gnpda2	droplet-Fat	up-regulated
Rcor3	droplet-Fat	up-regulated
Trib2	droplet-Fat	up-regulated
Ecm2	droplet-Fat	up-regulated
Atp1a2	droplet-Fat	up-regulated
Vprbp	droplet-Fat	up-regulated
Ccdc134	droplet-Fat	up-regulated
Flt4	droplet-Fat	up-regulated
Atg16l2	droplet-Fat	up-regulated
Rora	droplet-Fat	up-regulated
Sesn3	droplet-Fat	up-regulated
Slx1b	droplet-Fat	up-regulated
Ndn	droplet-Fat	up-regulated
Stim1	droplet-Fat	up-regulated
Pgpep1	droplet-Fat	up-regulated
Trmt61b	droplet-Fat	up-regulated
Casc4	droplet-Fat	up-regulated
Tgtp2	droplet-Fat	up-regulated
Irf2bp1	droplet-Fat	up-regulated
Apol10b	droplet-Fat	up-regulated
H2-Q4	droplet-Fat	up-regulated
4933421E11Rik	droplet-Fat	up-regulated
Spen	droplet-Fat	up-regulated
Eif2ak4	droplet-Fat	up-regulated
Car8	droplet-Fat	up-regulated
Eif2s3y	droplet-Fat	up-regulated
Dbp	droplet-Heart_and_Aorta	down-regulated
Hnrnpul1	droplet-Heart_and_Aorta	down-regulated
Dhx30	droplet-Heart_and_Aorta	down-regulated
Tanc2	droplet-Heart_and_Aorta	down-regulated
Rab4a	droplet-Heart_and_Aorta	down-regulated
Chn2	droplet-Heart_and_Aorta	down-regulated
Wdfy1	droplet-Heart_and_Aorta	down-regulated
Olfr1033	droplet-Heart_and_Aorta	down-regulated
Ptpla	droplet-Heart_and_Aorta	down-regulated
Hist1h1e	droplet-Heart_and_Aorta	down-regulated
Cklf	droplet-Heart_and_Aorta	down-regulated
Chst7	droplet-Heart_and_Aorta	down-regulated
Gart	droplet-Heart_and_Aorta	down-regulated
Parg	droplet-Heart_and_Aorta	down-regulated
D4Bwg0951e	droplet-Heart_and_Aorta	down-regulated
Morc3	droplet-Heart_and_Aorta	down-regulated
Lrrc14	droplet-Heart_and_Aorta	down-regulated
Aplnr	droplet-Heart_and_Aorta	down-regulated
Tbxa2r	droplet-Heart_and_Aorta	down-regulated
Brcc3	droplet-Heart_and_Aorta	down-regulated
Cep250	droplet-Heart_and_Aorta	down-regulated
Ankrd13c	droplet-Heart_and_Aorta	down-regulated
Ahsa1	droplet-Heart_and_Aorta	down-regulated
Spred1	droplet-Heart_and_Aorta	down-regulated
Igsf10	droplet-Heart_and_Aorta	down-regulated
D830031N03Rik	droplet-Heart_and_Aorta	down-regulated
Ckmt2	droplet-Heart_and_Aorta	down-regulated
Ppp4c	droplet-Heart_and_Aorta	down-regulated
Chka	droplet-Heart_and_Aorta	down-regulated
Abhd13	droplet-Heart_and_Aorta	down-regulated
6820431F20Rik	droplet-Heart_and_Aorta	down-regulated
Ddx17	droplet-Heart_and_Aorta	down-regulated
Fert2	droplet-Heart_and_Aorta	down-regulated
2310037I24Rik	droplet-Heart_and_Aorta	down-regulated
Adamts10	droplet-Heart_and_Aorta	down-regulated
P4ha1	droplet-Heart_and_Aorta	down-regulated
Slc25a23	droplet-Heart_and_Aorta	down-regulated
Ddit4	droplet-Heart_and_Aorta	down-regulated
Sema6a	droplet-Heart_and_Aorta	down-regulated
Shmt2	droplet-Heart_and_Aorta	down-regulated
Nr1d2	droplet-Heart_and_Aorta	down-regulated
Ube2d1	droplet-Heart_and_Aorta	down-regulated
Prex2	droplet-Heart_and_Aorta	down-regulated
Taf13	droplet-Heart_and_Aorta	down-regulated
Jarid2	droplet-Heart_and_Aorta	down-regulated
Arhgap5	droplet-Heart_and_Aorta	down-regulated
D0H4S114	droplet-Heart_and_Aorta	down-regulated
Gcc1	droplet-Heart_and_Aorta	down-regulated
Atp1a2	droplet-Heart_and_Aorta	down-regulated
Bcl6	droplet-Heart_and_Aorta	down-regulated
Trnp1	droplet-Heart_and_Aorta	up-regulated
Cldn15	droplet-Heart_and_Aorta	up-regulated
Csprs	droplet-Heart_and_Aorta	up-regulated
Mir1931	droplet-Heart_and_Aorta	up-regulated
Pisd-ps3	droplet-Heart_and_Aorta	up-regulated
Rbm3	droplet-Heart_and_Aorta	up-regulated
Plscr2	droplet-Heart_and_Aorta	up-regulated
Gm694	droplet-Heart_and_Aorta	up-regulated
9330133O14Rik	droplet-Heart_and_Aorta	up-regulated
C130026I21Rik	droplet-Heart_and_Aorta	up-regulated
Cirbp	droplet-Heart_and_Aorta	up-regulated
Nudt22	droplet-Heart_and_Aorta	up-regulated
Pigu	droplet-Heart_and_Aorta	up-regulated
Map3k12	droplet-Heart_and_Aorta	up-regulated
Serpini1	droplet-Heart_and_Aorta	up-regulated
Htatip2	droplet-Heart_and_Aorta	up-regulated
Serhl	droplet-Heart_and_Aorta	up-regulated
Hoxb4	droplet-Heart_and_Aorta	up-regulated
Nr4a2	droplet-Heart_and_Aorta	up-regulated
Gsta3	droplet-Heart_and_Aorta	up-regulated
Gda	droplet-Heart_and_Aorta	up-regulated
Fam110a	droplet-Heart_and_Aorta	up-regulated
Slc25a37	droplet-Heart_and_Aorta	up-regulated
Fcgr2b	droplet-Heart_and_Aorta	up-regulated
Stat3	droplet-Heart_and_Aorta	up-regulated
Trim16	droplet-Heart_and_Aorta	up-regulated
Haghl	droplet-Heart_and_Aorta	up-regulated
Arrb1	droplet-Heart_and_Aorta	up-regulated
Hrct1	droplet-Heart_and_Aorta	up-regulated
Fuca1	droplet-Heart_and_Aorta	up-regulated
Ralgds	droplet-Heart_and_Aorta	up-regulated
Cbx7	droplet-Heart_and_Aorta	up-regulated
Tbx3	droplet-Heart_and_Aorta	up-regulated
Wwp2	droplet-Heart_and_Aorta	up-regulated
Plat	droplet-Heart_and_Aorta	up-regulated
C4b	droplet-Heart_and_Aorta	up-regulated
Map1lc3b	droplet-Heart_and_Aorta	up-regulated
Sertad1	droplet-Heart_and_Aorta	up-regulated
Tmem218	droplet-Heart_and_Aorta	up-regulated
Pbxip1	droplet-Heart_and_Aorta	up-regulated
2310047M10Rik	droplet-Heart_and_Aorta	up-regulated
Klra9	droplet-Heart_and_Aorta	up-regulated
Rasl11a	droplet-Heart_and_Aorta	up-regulated
Ide	droplet-Heart_and_Aorta	up-regulated
Ppwd1	droplet-Heart_and_Aorta	up-regulated
Avpi1	droplet-Heart_and_Aorta	up-regulated
Pla1a	droplet-Heart_and_Aorta	up-regulated
Sncg	droplet-Heart_and_Aorta	up-regulated
Plcb4	droplet-Heart_and_Aorta	up-regulated
Agmo	droplet-Heart_and_Aorta	up-regulated
Col4a5	droplet-Kidney	down-regulated
Nnt	droplet-Kidney	down-regulated
Wdfy1	droplet-Kidney	down-regulated
Dio1	droplet-Kidney	down-regulated
Cdk5rap1	droplet-Kidney	down-regulated
P2ry6	droplet-Kidney	down-regulated
Sgsm3	droplet-Kidney	down-regulated
Slx1b	droplet-Kidney	down-regulated
Sult1a1	droplet-Kidney	down-regulated
Dbp	droplet-Kidney	down-regulated
Ppp1r9a	droplet-Kidney	down-regulated
Tef	droplet-Kidney	down-regulated
Rp2h	droplet-Kidney	down-regulated
Yes1	droplet-Kidney	down-regulated
Gcgr	droplet-Kidney	down-regulated
Scrn2	droplet-Kidney	down-regulated
Ripk4	droplet-Kidney	down-regulated
Rhbdf1	droplet-Kidney	down-regulated
Pde4c	droplet-Kidney	down-regulated
A430084P05Rik	droplet-Kidney	down-regulated
Mlxip	droplet-Kidney	down-regulated
Usp2	droplet-Kidney	down-regulated
Ebi3	droplet-Kidney	down-regulated
Ldlrad3	droplet-Kidney	down-regulated
Gm12070	droplet-Kidney	down-regulated
Klhl17	droplet-Kidney	down-regulated
Cav2	droplet-Kidney	down-regulated
Tfpi	droplet-Kidney	down-regulated
Nudt8	droplet-Kidney	down-regulated
Coq10b	droplet-Kidney	down-regulated
Tmem86a	droplet-Kidney	down-regulated
Slc25a10	droplet-Kidney	down-regulated
Npc1	droplet-Kidney	down-regulated
Gpx6	droplet-Kidney	down-regulated
Camta2	droplet-Kidney	down-regulated
BC002163	droplet-Kidney	down-regulated
Rint1	droplet-Kidney	down-regulated
Abhd4	droplet-Kidney	down-regulated
Slc35e4	droplet-Kidney	down-regulated
Tmem143	droplet-Kidney	down-regulated
2610017I09Rik	droplet-Kidney	down-regulated
Dcakd	droplet-Kidney	down-regulated
Rpl30	droplet-Kidney	down-regulated
Ddit4	droplet-Kidney	down-regulated
Ptpla	droplet-Kidney	down-regulated
Terf1	droplet-Kidney	down-regulated
Aldoc	droplet-Kidney	down-regulated
Oas1a	droplet-Kidney	down-regulated
Msh2	droplet-Kidney	down-regulated
Serpinh1	droplet-Kidney	down-regulated
Csprs	droplet-Kidney	up-regulated
Azgp1	droplet-Kidney	up-regulated
Timd2	droplet-Kidney	up-regulated
Pisd-ps3	droplet-Kidney	up-regulated
Atp2b4	droplet-Kidney	up-regulated
Hoxd8	droplet-Kidney	up-regulated
2010003K15Rik	droplet-Kidney	up-regulated
Npl	droplet-Kidney	up-regulated
Gltpd1	droplet-Kidney	up-regulated
Scg5	droplet-Kidney	up-regulated
2700007P21Rik	droplet-Kidney	up-regulated
Spns3	droplet-Kidney	up-regulated
Kctd1	droplet-Kidney	up-regulated
Snupn	droplet-Kidney	up-regulated
Fgf9	droplet-Kidney	up-regulated
Oplah	droplet-Kidney	up-regulated
Ttc19	droplet-Kidney	up-regulated
Aoah	droplet-Kidney	up-regulated
Hbb-b1	droplet-Kidney	up-regulated
Htatip2	droplet-Kidney	up-regulated
1500011B03Rik	droplet-Kidney	up-regulated
Atp4a	droplet-Kidney	up-regulated
Zmat3	droplet-Kidney	up-regulated
Cyp4a12a	droplet-Kidney	up-regulated
Lmnb2	droplet-Kidney	up-regulated
1810026B05Rik	droplet-Kidney	up-regulated
Ttl	droplet-Kidney	up-regulated
Ar	droplet-Kidney	up-regulated
Nt5dc1	droplet-Kidney	up-regulated
Etv1	droplet-Kidney	up-regulated
D14Ertd449e	droplet-Kidney	up-regulated
Efhd1	droplet-Kidney	up-regulated
Zc3h12c	droplet-Kidney	up-regulated
Hyou1	droplet-Kidney	up-regulated
Egln3	droplet-Kidney	up-regulated
Fgf1	droplet-Kidney	up-regulated
Rab2b	droplet-Kidney	up-regulated
Hsd17b7	droplet-Kidney	up-regulated
Ddx3y	droplet-Kidney	up-regulated
Man2a1	droplet-Kidney	up-regulated
Phf20	droplet-Kidney	up-regulated
Clec2d	droplet-Kidney	up-regulated
Ptger3	droplet-Kidney	up-regulated
Hist3h2ba	droplet-Kidney	up-regulated
Tnrc6a	droplet-Kidney	up-regulated
Gm6654	droplet-Kidney	up-regulated
Opa3	droplet-Kidney	up-regulated
Nlk	droplet-Kidney	up-regulated
Slc25a44	droplet-Kidney	up-regulated
Ldhd	droplet-Kidney	up-regulated
Tef	droplet-Limb_Muscle	down-regulated
Dbp	droplet-Limb_Muscle	down-regulated
Gm12657	droplet-Limb_Muscle	down-regulated
Nr1d2	droplet-Limb_Muscle	down-regulated
Podxl2	droplet-Limb_Muscle	down-regulated
Wdfy1	droplet-Limb_Muscle	down-regulated
Rps19-ps3	droplet-Limb_Muscle	down-regulated
Tet3	droplet-Limb_Muscle	down-regulated
Gm6251	droplet-Limb_Muscle	down-regulated
Mcf2l	droplet-Limb_Muscle	down-regulated
Gm9320	droplet-Limb_Muscle	down-regulated
Unc45b	droplet-Limb_Muscle	down-regulated
Dgka	droplet-Limb_Muscle	down-regulated
Efnb2	droplet-Limb_Muscle	down-regulated
Dennd3	droplet-Limb_Muscle	down-regulated
Gm6222	droplet-Limb_Muscle	down-regulated
Icosl	droplet-Limb_Muscle	down-regulated
Limd2	droplet-Limb_Muscle	down-regulated
Gpc6	droplet-Limb_Muscle	down-regulated
Rnf38	droplet-Limb_Muscle	down-regulated
Pxdn	droplet-Limb_Muscle	down-regulated
Igf2bp2	droplet-Limb_Muscle	down-regulated
Epha2	droplet-Limb_Muscle	down-regulated
A930005H10Rik	droplet-Limb_Muscle	down-regulated
Klhl2	droplet-Limb_Muscle	down-regulated
Polg	droplet-Limb_Muscle	down-regulated
Wipi2	droplet-Limb_Muscle	down-regulated
Bcl2l1	droplet-Limb_Muscle	down-regulated
Evl	droplet-Limb_Muscle	down-regulated
Zbtb16	droplet-Limb_Muscle	down-regulated
Frat2	droplet-Limb_Muscle	down-regulated
Itpk1	droplet-Limb_Muscle	down-regulated
Fchsd2	droplet-Limb_Muscle	down-regulated
Grb10	droplet-Limb_Muscle	down-regulated
Gimap5	droplet-Limb_Muscle	down-regulated
Tmc6	droplet-Limb_Muscle	down-regulated
Xist	droplet-Limb_Muscle	down-regulated
Ttpal	droplet-Limb_Muscle	down-regulated
Ret	droplet-Limb_Muscle	down-regulated
Hmha1	droplet-Limb_Muscle	down-regulated
Gm12504	droplet-Limb_Muscle	down-regulated
Ccdc25	droplet-Limb_Muscle	down-regulated
Glt25d2	droplet-Limb_Muscle	down-regulated
Foxn3	droplet-Limb_Muscle	down-regulated
Satb1	droplet-Limb_Muscle	down-regulated
Kdm5b	droplet-Limb_Muscle	down-regulated
Parvb	droplet-Limb_Muscle	down-regulated
Pik3ip1	droplet-Limb_Muscle	down-regulated
Tbcel	droplet-Limb_Muscle	down-regulated
Ube2d1	droplet-Limb_Muscle	down-regulated
Pisd-ps3	droplet-Limb_Muscle	up-regulated
Apol10b	droplet-Limb_Muscle	up-regulated
Cct6a	droplet-Limb_Muscle	up-regulated
H2-Q8	droplet-Limb_Muscle	up-regulated
Bmpr2	droplet-Limb_Muscle	up-regulated
Abca8b	droplet-Limb_Muscle	up-regulated
Ptprd	droplet-Limb_Muscle	up-regulated
Clic5	droplet-Limb_Muscle	up-regulated
Tuba4a	droplet-Limb_Muscle	up-regulated
Kdr	droplet-Limb_Muscle	up-regulated
Cap1	droplet-Limb_Muscle	up-regulated
Eif2s3y	droplet-Limb_Muscle	up-regulated
Rev3l	droplet-Limb_Muscle	up-regulated
Plau	droplet-Limb_Muscle	up-regulated
Cx3cl1	droplet-Limb_Muscle	up-regulated
Entpd4	droplet-Limb_Muscle	up-regulated
Haus7	droplet-Limb_Muscle	up-regulated
Ccdc82	droplet-Limb_Muscle	up-regulated
Sp100	droplet-Limb_Muscle	up-regulated
Zfp639	droplet-Limb_Muscle	up-regulated
Enpp5	droplet-Limb_Muscle	up-regulated
Syne2	droplet-Limb_Muscle	up-regulated
Sp140	droplet-Limb_Muscle	up-regulated
Fert2	droplet-Limb_Muscle	up-regulated
Tle4	droplet-Limb_Muscle	up-regulated
Plscr4	droplet-Limb_Muscle	up-regulated
Ddx6	droplet-Limb_Muscle	up-regulated
Pparg	droplet-Limb_Muscle	up-regulated
Trim41	droplet-Limb_Muscle	up-regulated
Fcho2	droplet-Limb_Muscle	up-regulated
Nes	droplet-Limb_Muscle	up-regulated
Iqcb1	droplet-Limb_Muscle	up-regulated
Vps13a	droplet-Limb_Muscle	up-regulated
Stag1	droplet-Limb_Muscle	up-regulated
Nbeal1	droplet-Limb_Muscle	up-regulated
Prpf4b	droplet-Limb_Muscle	up-regulated
Pafah1b3	droplet-Limb_Muscle	up-regulated
Htatip2	droplet-Limb_Muscle	up-regulated
Itga1	droplet-Limb_Muscle	up-regulated
Zbed6	droplet-Limb_Muscle	up-regulated
Lmnb1	droplet-Limb_Muscle	up-regulated
Clock	droplet-Limb_Muscle	up-regulated
Snapin	droplet-Limb_Muscle	up-regulated
Slc7a5	droplet-Limb_Muscle	up-regulated
Rad50	droplet-Limb_Muscle	up-regulated
Ubxn2a	droplet-Limb_Muscle	up-regulated
Chd9	droplet-Limb_Muscle	up-regulated
Fxr1	droplet-Limb_Muscle	up-regulated
Ankib1	droplet-Limb_Muscle	up-regulated
Upf2	droplet-Limb_Muscle	up-regulated
Skap1	droplet-Liver	down-regulated
Pcolce2	droplet-Liver	down-regulated
Pxdn	droplet-Liver	down-regulated
Ece2	droplet-Liver	down-regulated
Ddit4	droplet-Liver	down-regulated
Grb10	droplet-Liver	down-regulated
Il2rb	droplet-Liver	down-regulated
Rab4a	droplet-Liver	down-regulated
Cdh1	droplet-Liver	down-regulated
Cav2	droplet-Liver	down-regulated
Jak2	droplet-Liver	down-regulated
Gypc	droplet-Liver	down-regulated
Tmem223	droplet-Liver	down-regulated
Ces3b	droplet-Liver	down-regulated
Nlk	droplet-Liver	down-regulated
B230118H07Rik	droplet-Liver	down-regulated
Rras2	droplet-Liver	down-regulated
Col4a1	droplet-Liver	down-regulated
Xrcc6bp1	droplet-Liver	down-regulated
Gimap5	droplet-Liver	down-regulated
Egfr	droplet-Liver	down-regulated
Efemp2	droplet-Liver	down-regulated
Usp12	droplet-Liver	down-regulated
Klk8	droplet-Liver	down-regulated
Ptp4a3	droplet-Liver	down-regulated
Fam176b	droplet-Liver	down-regulated
Smc5	droplet-Liver	down-regulated
Ccnf	droplet-Liver	down-regulated
E130309D02Rik	droplet-Liver	down-regulated
Eif4ebp3	droplet-Liver	down-regulated
Slfn8	droplet-Liver	down-regulated
Icos	droplet-Liver	down-regulated
Ndufaf2	droplet-Liver	down-regulated
Dbp	droplet-Liver	down-regulated
Fam189b	droplet-Liver	down-regulated
Med8	droplet-Liver	down-regulated
Parg	droplet-Liver	down-regulated
Inppl1	droplet-Liver	down-regulated
Tmem147	droplet-Liver	down-regulated
Ino80e	droplet-Liver	down-regulated
Wdfy1	droplet-Liver	down-regulated
Cd163	droplet-Liver	down-regulated
Ppap2a	droplet-Liver	down-regulated
Socs2	droplet-Liver	down-regulated
Kdm5b	droplet-Liver	down-regulated
Atg9a	droplet-Liver	down-regulated
Atp8b1	droplet-Liver	down-regulated
Tspan7	droplet-Liver	down-regulated
Xpo6	droplet-Liver	down-regulated
Klf9	droplet-Liver	down-regulated
Tox	droplet-Liver	up-regulated
Csf1	droplet-Liver	up-regulated
Clstn3	droplet-Liver	up-regulated
Trp53i13	droplet-Liver	up-regulated
Sucnr1	droplet-Liver	up-regulated
Csprs	droplet-Liver	up-regulated
Gm7609	droplet-Liver	up-regulated
Mfng	droplet-Liver	up-regulated
Pggt1b	droplet-Liver	up-regulated
Gja1	droplet-Liver	up-regulated
Ccrn4l	droplet-Liver	up-regulated
Id4	droplet-Liver	up-regulated
Plekhm3	droplet-Liver	up-regulated
Cd80	droplet-Liver	up-regulated
Fchsd2	droplet-Liver	up-regulated
Cnpy4	droplet-Liver	up-regulated
Golga1	droplet-Liver	up-regulated
Art3	droplet-Liver	up-regulated
Mir1931	droplet-Liver	up-regulated
1700112E06Rik	droplet-Liver	up-regulated
Wdr89	droplet-Liver	up-regulated
Vps37b	droplet-Liver	up-regulated
Sowahc	droplet-Liver	up-regulated
Cyp26a1	droplet-Liver	up-regulated
Rpl34-ps1	droplet-Liver	up-regulated
Pdgfc	droplet-Liver	up-regulated
Cirbp	droplet-Liver	up-regulated
Anks1	droplet-Liver	up-regulated
BC002163	droplet-Liver	up-regulated
1810026B05Rik	droplet-Liver	up-regulated
Slc16a3	droplet-Liver	up-regulated
Lag3	droplet-Liver	up-regulated
Smad7	droplet-Liver	up-regulated
Adss	droplet-Liver	up-regulated
Nfil3	droplet-Liver	up-regulated
Prnp	droplet-Liver	up-regulated
Clk1	droplet-Liver	up-regulated
4933421E11Rik	droplet-Liver	up-regulated
Agpat4	droplet-Liver	up-regulated
Gm6654	droplet-Liver	up-regulated
Rnd1	droplet-Liver	up-regulated
Cyp3a44	droplet-Liver	up-regulated
Mphosph10	droplet-Liver	up-regulated
Elf1	droplet-Liver	up-regulated
Gm9320	droplet-Liver	up-regulated
Nr4a1	droplet-Liver	up-regulated
Hes1	droplet-Liver	up-regulated
Btg1	droplet-Liver	up-regulated
Ing5	droplet-Liver	up-regulated
Gm15421	droplet-Liver	up-regulated
Dbp	droplet-Lung	down-regulated
Lpcat4	droplet-Lung	down-regulated
Trmt61a	droplet-Lung	down-regulated
5031426D15Rik	droplet-Lung	down-regulated
Gm5506	droplet-Lung	down-regulated
Prkcq	droplet-Lung	down-regulated
Nr1d1	droplet-Lung	down-regulated
Net1	droplet-Lung	down-regulated
Rps19-ps3	droplet-Lung	down-regulated
Fkbp5	droplet-Lung	down-regulated
Satb1	droplet-Lung	down-regulated
Gm6222	droplet-Lung	down-regulated
Itpripl1	droplet-Lung	down-regulated
Pik3ip1	droplet-Lung	down-regulated
A430084P05Rik	droplet-Lung	down-regulated
2810001G20Rik	droplet-Lung	down-regulated
Tmem47	droplet-Lung	down-regulated
Fbxo3	droplet-Lung	down-regulated
Wdfy1	droplet-Lung	down-regulated
Ddit4	droplet-Lung	down-regulated
Prps2	droplet-Lung	down-regulated
Zfp740	droplet-Lung	down-regulated
Slc25a46	droplet-Lung	down-regulated
Fam176b	droplet-Lung	down-regulated
Gm6251	droplet-Lung	down-regulated
B430010I23Rik	droplet-Lung	down-regulated
Sppl3	droplet-Lung	down-regulated
Gdi1	droplet-Lung	down-regulated
Dapk1	droplet-Lung	down-regulated
2810008D09Rik	droplet-Lung	down-regulated
Sesn1	droplet-Lung	down-regulated
1190002N15Rik	droplet-Lung	down-regulated
Gm6548	droplet-Lung	down-regulated
Nras	droplet-Lung	down-regulated
Atf2	droplet-Lung	down-regulated
Il1rn	droplet-Lung	down-regulated
Evl	droplet-Lung	down-regulated
Zfp871	droplet-Lung	down-regulated
Atm	droplet-Lung	down-regulated
Hdac2	droplet-Lung	down-regulated
Gm1821	droplet-Lung	down-regulated
Gm12657	droplet-Lung	down-regulated
Rfwd3	droplet-Lung	down-regulated
Senp3	droplet-Lung	down-regulated
Gabpb1	droplet-Lung	down-regulated
Sla	droplet-Lung	down-regulated
Akt1	droplet-Lung	down-regulated
Nudt13	droplet-Lung	down-regulated
Rbm18	droplet-Lung	down-regulated
Serinc3	droplet-Lung	down-regulated
Xrn1	droplet-Lung	up-regulated
Gpr183	droplet-Lung	up-regulated
Lyst	droplet-Lung	up-regulated
Nr4a2	droplet-Lung	up-regulated
Cd274	droplet-Lung	up-regulated
Ciita	droplet-Lung	up-regulated
Cep350	droplet-Lung	up-regulated
Zcchc11	droplet-Lung	up-regulated
Lnpep	droplet-Lung	up-regulated
Mef2a	droplet-Lung	up-regulated
Rel	droplet-Lung	up-regulated
Pisd-ps3	droplet-Lung	up-regulated
Gimap7	droplet-Lung	up-regulated
Trip11	droplet-Lung	up-regulated
5430435G22Rik	droplet-Lung	up-regulated
Cct6a	droplet-Lung	up-regulated
Syne1	droplet-Lung	up-regulated
Sp100	droplet-Lung	up-regulated
Wrn	droplet-Lung	up-regulated
Havcr2	droplet-Lung	up-regulated
Mier1	droplet-Lung	up-regulated
Rnf125	droplet-Lung	up-regulated
A630007B06Rik	droplet-Lung	up-regulated
Wapal	droplet-Lung	up-regulated
Slc25a37	droplet-Lung	up-regulated
Hopx	droplet-Lung	up-regulated
Ptpn11	droplet-Lung	up-regulated
Syt11	droplet-Lung	up-regulated
Pcm1	droplet-Lung	up-regulated
Myst3	droplet-Lung	up-regulated
Erdr1	droplet-Lung	up-regulated
Arap2	droplet-Lung	up-regulated
Cdk14	droplet-Lung	up-regulated
Helz	droplet-Lung	up-regulated
Yy1	droplet-Lung	up-regulated
Chd9	droplet-Lung	up-regulated
Rad50	droplet-Lung	up-regulated
Nfe2l2	droplet-Lung	up-regulated
Gsta3	droplet-Lung	up-regulated
Aim2	droplet-Lung	up-regulated
Prdm2	droplet-Lung	up-regulated
Smarca5	droplet-Lung	up-regulated
Acbd5	droplet-Lung	up-regulated
Epc2	droplet-Lung	up-regulated
Ndrg1	droplet-Lung	up-regulated
Pura	droplet-Lung	up-regulated
Nbeal1	droplet-Lung	up-regulated
Tmem64	droplet-Lung	up-regulated
Flt1	droplet-Lung	up-regulated
Lysmd3	droplet-Lung	up-regulated
Gm12657	droplet-Mammary_Gland	down-regulated
Zhx2	droplet-Mammary_Gland	down-regulated
Gm9320	droplet-Mammary_Gland	down-regulated
Lef1	droplet-Mammary_Gland	down-regulated
Krr1	droplet-Mammary_Gland	down-regulated
Galnt6	droplet-Mammary_Gland	down-regulated
Dennd2a	droplet-Mammary_Gland	down-regulated
Fnip2	droplet-Mammary_Gland	down-regulated
Rab40c	droplet-Mammary_Gland	down-regulated
Pde3b	droplet-Mammary_Gland	down-regulated
2310037I24Rik	droplet-Mammary_Gland	down-regulated
Cd4	droplet-Mammary_Gland	down-regulated
Pyhin1	droplet-Mammary_Gland	down-regulated
Gm5506	droplet-Mammary_Gland	down-regulated
Ncs1	droplet-Mammary_Gland	down-regulated
Noc3l	droplet-Mammary_Gland	down-regulated
Zeb1	droplet-Mammary_Gland	down-regulated
A430107O13Rik	droplet-Mammary_Gland	down-regulated
Rps19-ps3	droplet-Mammary_Gland	down-regulated
Lhfpl2	droplet-Mammary_Gland	down-regulated
Zfp574	droplet-Mammary_Gland	down-regulated
Gm12504	droplet-Mammary_Gland	down-regulated
Sipa1l1	droplet-Mammary_Gland	down-regulated
Gm6251	droplet-Mammary_Gland	down-regulated
Patl1	droplet-Mammary_Gland	down-regulated
Eif2c2	droplet-Mammary_Gland	down-regulated
2010111I01Rik	droplet-Mammary_Gland	down-regulated
Dedd2	droplet-Mammary_Gland	down-regulated
Ticam1	droplet-Mammary_Gland	down-regulated
Polr1b	droplet-Mammary_Gland	down-regulated
Cd86	droplet-Mammary_Gland	down-regulated
Ugcg	droplet-Mammary_Gland	down-regulated
Rapgef6	droplet-Mammary_Gland	down-regulated
Tmub1	droplet-Mammary_Gland	down-regulated
Tinf2	droplet-Mammary_Gland	down-regulated
Satb1	droplet-Mammary_Gland	down-regulated
Gramd1a	droplet-Mammary_Gland	down-regulated
Hmha1	droplet-Mammary_Gland	down-regulated
Isy1	droplet-Mammary_Gland	down-regulated
Trit1	droplet-Mammary_Gland	down-regulated
Gm1821	droplet-Mammary_Gland	down-regulated
Sesn1	droplet-Mammary_Gland	down-regulated
Rpl30	droplet-Mammary_Gland	down-regulated
Rictor	droplet-Mammary_Gland	down-regulated
Zmat3	droplet-Mammary_Gland	down-regulated
Akirin2	droplet-Mammary_Gland	down-regulated
Fgfr1op	droplet-Mammary_Gland	down-regulated
Fam69a	droplet-Mammary_Gland	down-regulated
Nfatc2ip	droplet-Mammary_Gland	down-regulated
Ppm1h	droplet-Mammary_Gland	down-regulated
Zrsr1	droplet-Mammary_Gland	up-regulated
B3galtl	droplet-Mammary_Gland	up-regulated
Bcl11a	droplet-Mammary_Gland	up-regulated
Arhgef18	droplet-Mammary_Gland	up-regulated
Flt3l	droplet-Mammary_Gland	up-regulated
Nrm	droplet-Mammary_Gland	up-regulated
Slc7a5	droplet-Mammary_Gland	up-regulated
C130026I21Rik	droplet-Mammary_Gland	up-regulated
Adck3	droplet-Mammary_Gland	up-regulated
Nsmaf	droplet-Mammary_Gland	up-regulated
Ints1	droplet-Mammary_Gland	up-regulated
Prkcq	droplet-Mammary_Gland	up-regulated
5031426D15Rik	droplet-Mammary_Gland	up-regulated
Cirbp	droplet-Mammary_Gland	up-regulated
Tmem45a	droplet-Mammary_Gland	up-regulated
Cxcr4	droplet-Mammary_Gland	up-regulated
Evi2a	droplet-Mammary_Gland	up-regulated
Ift172	droplet-Mammary_Gland	up-regulated
Rnf10	droplet-Mammary_Gland	up-regulated
Cd6	droplet-Mammary_Gland	up-regulated
Crlf2	droplet-Mammary_Gland	up-regulated
Cd28	droplet-Mammary_Gland	up-regulated
4930572J05Rik	droplet-Mammary_Gland	up-regulated
Taf2	droplet-Mammary_Gland	up-regulated
Gng2	droplet-Mammary_Gland	up-regulated
Hcst	droplet-Mammary_Gland	up-regulated
Cwf19l2	droplet-Mammary_Gland	up-regulated
Gpr183	droplet-Mammary_Gland	up-regulated
Fibin	droplet-Mammary_Gland	up-regulated
Bank1	droplet-Mammary_Gland	up-regulated
Zfp277	droplet-Mammary_Gland	up-regulated
Dkk3	droplet-Mammary_Gland	up-regulated
Irs2	droplet-Mammary_Gland	up-regulated
Ikbkap	droplet-Mammary_Gland	up-regulated
Bet1	droplet-Mammary_Gland	up-regulated
Arhgef10	droplet-Mammary_Gland	up-regulated
Hgsnat	droplet-Mammary_Gland	up-regulated
Gcc1	droplet-Mammary_Gland	up-regulated
H2-Oa	droplet-Mammary_Gland	up-regulated
Bcl2	droplet-Mammary_Gland	up-regulated
Ssbp4	droplet-Mammary_Gland	up-regulated
Myo9a	droplet-Mammary_Gland	up-regulated
Pdia3	droplet-Mammary_Gland	up-regulated
Kif21b	droplet-Mammary_Gland	up-regulated
Dgkz	droplet-Mammary_Gland	up-regulated
Selm	droplet-Mammary_Gland	up-regulated
Tmem5	droplet-Mammary_Gland	up-regulated
Cyp4f18	droplet-Mammary_Gland	up-regulated
5730494N06Rik	droplet-Mammary_Gland	up-regulated
Nup205	droplet-Mammary_Gland	up-regulated
Wdfy1	droplet-Marrow	down-regulated
Rasl11b	droplet-Marrow	down-regulated
Rfwd2	droplet-Marrow	down-regulated
Ddit4	droplet-Marrow	down-regulated
Gm12657	droplet-Marrow	down-regulated
Zfp518a	droplet-Marrow	down-regulated
Nnt	droplet-Marrow	down-regulated
Oas1a	droplet-Marrow	down-regulated
Samd9l	droplet-Marrow	down-regulated
Stat4	droplet-Marrow	down-regulated
Kdm6a	droplet-Marrow	down-regulated
Hnrnpul1	droplet-Marrow	down-regulated
BC147527	droplet-Marrow	down-regulated
Cdk2ap1	droplet-Marrow	down-regulated
Sppl3	droplet-Marrow	down-regulated
Parg	droplet-Marrow	down-regulated
Klf9	droplet-Marrow	down-regulated
Zfp467	droplet-Marrow	down-regulated
Sik1	droplet-Marrow	down-regulated
Zfp608	droplet-Marrow	down-regulated
Arrdc3	droplet-Marrow	down-regulated
Smad7	droplet-Marrow	down-regulated
Lyst	droplet-Marrow	down-regulated
Rps4y2	droplet-Marrow	down-regulated
Kdm5c	droplet-Marrow	down-regulated
Fcho2	droplet-Marrow	down-regulated
Ly9	droplet-Marrow	down-regulated
Dennd1b	droplet-Marrow	down-regulated
Trib1	droplet-Marrow	down-regulated
Fmnl2	droplet-Marrow	down-regulated
Jmjd1c	droplet-Marrow	down-regulated
Ets1	droplet-Marrow	down-regulated
Mxd1	droplet-Marrow	down-regulated
Vps37c	droplet-Marrow	down-regulated
Suv420h1	droplet-Marrow	down-regulated
Trem1	droplet-Marrow	down-regulated
Zufsp	droplet-Marrow	down-regulated
Chd9	droplet-Marrow	down-regulated
Atg4a	droplet-Marrow	down-regulated
Crispld2	droplet-Marrow	down-regulated
Oas3	droplet-Marrow	down-regulated
D14Abb1e	droplet-Marrow	down-regulated
Exoc2	droplet-Marrow	down-regulated
Calcrl	droplet-Marrow	down-regulated
Cspp1	droplet-Marrow	down-regulated
Mef2a	droplet-Marrow	down-regulated
Dnaja4	droplet-Marrow	down-regulated
Slc27a4	droplet-Marrow	down-regulated
Lrrk2	droplet-Marrow	down-regulated
Cbx6	droplet-Marrow	down-regulated
C130026I21Rik	droplet-Marrow	up-regulated
1700112E06Rik	droplet-Marrow	up-regulated
A530032D15Rik	droplet-Marrow	up-regulated
Il10ra	droplet-Marrow	up-regulated
Eif2s3y	droplet-Marrow	up-regulated
Ryr1	droplet-Marrow	up-regulated
Olfm1	droplet-Marrow	up-regulated
Ddx3y	droplet-Marrow	up-regulated
Ankrd33b	droplet-Marrow	up-regulated
D14Ertd449e	droplet-Marrow	up-regulated
Mrgpra2b	droplet-Marrow	up-regulated
Chd3	droplet-Marrow	up-regulated
Zbp1	droplet-Marrow	up-regulated
2810403A07Rik	droplet-Marrow	up-regulated
Aph1c	droplet-Marrow	up-regulated
Clec2d	droplet-Marrow	up-regulated
Ass1	droplet-Marrow	up-regulated
1700047M11Rik	droplet-Marrow	up-regulated
Mllt10	droplet-Marrow	up-regulated
Ubash3b	droplet-Marrow	up-regulated
Tspan17	droplet-Marrow	up-regulated
Mex3c	droplet-Marrow	up-regulated
Fpr2	droplet-Marrow	up-regulated
Pim1	droplet-Marrow	up-regulated
Mmgt1	droplet-Marrow	up-regulated
Sertad1	droplet-Marrow	up-regulated
Lime1	droplet-Marrow	up-regulated
Dusp12	droplet-Marrow	up-regulated
Armc3	droplet-Marrow	up-regulated
N4bp1	droplet-Marrow	up-regulated
Srf	droplet-Marrow	up-regulated
BC088983	droplet-Marrow	up-regulated
Hist4h4	droplet-Marrow	up-regulated
Wipf2	droplet-Marrow	up-regulated
Rhbdf2	droplet-Marrow	up-regulated
Ccdc18	droplet-Marrow	up-regulated
Ffar2	droplet-Marrow	up-regulated
Rassf1	droplet-Marrow	up-regulated
Chsy1	droplet-Marrow	up-regulated
Slc15a4	droplet-Marrow	up-regulated
Mfn1	droplet-Marrow	up-regulated
Ddit3	droplet-Marrow	up-regulated
Zfp217	droplet-Marrow	up-regulated
App	droplet-Marrow	up-regulated
Erdr1	droplet-Marrow	up-regulated
Mad2l1bp	droplet-Marrow	up-regulated
E2f2	droplet-Marrow	up-regulated
Fbxo5	droplet-Marrow	up-regulated
Nfe2l2	droplet-Marrow	up-regulated
Tnk2	droplet-Marrow	up-regulated
Gm5409	droplet-Pancreas	down-regulated
Tsix	droplet-Pancreas	down-regulated
Pibf1	droplet-Pancreas	down-regulated
Igf2bp3	droplet-Pancreas	down-regulated
Itga4	droplet-Pancreas	down-regulated
Tmem101	droplet-Pancreas	down-regulated
Dcaf6	droplet-Pancreas	down-regulated
Plekha2	droplet-Pancreas	down-regulated
Zkscan3	droplet-Pancreas	down-regulated
Nr6a1	droplet-Pancreas	down-regulated
Usf1	droplet-Pancreas	down-regulated
St3gal3	droplet-Pancreas	down-regulated
Mdm1	droplet-Pancreas	down-regulated
Usp51	droplet-Pancreas	down-regulated
Ccdc50	droplet-Pancreas	down-regulated
Wibg	droplet-Pancreas	down-regulated
Fkbp5	droplet-Pancreas	down-regulated
B430010I23Rik	droplet-Pancreas	down-regulated
Tacc2	droplet-Pancreas	down-regulated
Srgap1	droplet-Pancreas	down-regulated
Fchsd2	droplet-Pancreas	down-regulated
Sepn1	droplet-Pancreas	down-regulated
AI428936	droplet-Pancreas	down-regulated
Trib1	droplet-Pancreas	down-regulated
Rgs11	droplet-Pancreas	down-regulated
Cry2	droplet-Pancreas	down-regulated
Sstr3	droplet-Pancreas	down-regulated
Rnf38	droplet-Pancreas	down-regulated
Wipi2	droplet-Pancreas	down-regulated
Tle3	droplet-Pancreas	down-regulated
Slc37a4	droplet-Pancreas	down-regulated
Tfrc	droplet-Pancreas	down-regulated
Snf8	droplet-Pancreas	down-regulated
Tial1	droplet-Pancreas	down-regulated
Raph1	droplet-Pancreas	down-regulated
Asb8	droplet-Pancreas	down-regulated
Hnf4a	droplet-Pancreas	down-regulated
Gck	droplet-Pancreas	down-regulated
Gdap1l1	droplet-Pancreas	down-regulated
Hepacam2	droplet-Pancreas	down-regulated
Galntl4	droplet-Pancreas	down-regulated
Atg7	droplet-Pancreas	down-regulated
Bcl2	droplet-Pancreas	down-regulated
Elavl4	droplet-Pancreas	down-regulated
Ggt7	droplet-Pancreas	down-regulated
Gmfb	droplet-Pancreas	down-regulated
Mapk15	droplet-Pancreas	down-regulated
Ehbp1	droplet-Pancreas	down-regulated
Aars	droplet-Pancreas	down-regulated
Polg	droplet-Pancreas	down-regulated
Lcmt1	droplet-Pancreas	up-regulated
Eif2s3y	droplet-Pancreas	up-regulated
Gstk1	droplet-Pancreas	up-regulated
Cckar	droplet-Pancreas	up-regulated
Igf1	droplet-Pancreas	up-regulated
9130014G24Rik	droplet-Pancreas	up-regulated
Kctd2	droplet-Pancreas	up-regulated
Rsrc1	droplet-Pancreas	up-regulated
Rev3l	droplet-Pancreas	up-regulated
Cdh22	droplet-Pancreas	up-regulated
Magee1	droplet-Pancreas	up-regulated
Ddx3y	droplet-Pancreas	up-regulated
Zfyve16	droplet-Pancreas	up-regulated
Vps33a	droplet-Pancreas	up-regulated
Pcnt	droplet-Pancreas	up-regulated
Bcor	droplet-Pancreas	up-regulated
Lars2	droplet-Pancreas	up-regulated
Slk	droplet-Pancreas	up-regulated
Erc1	droplet-Pancreas	up-regulated
Jmjd6	droplet-Pancreas	up-regulated
Ints6	droplet-Pancreas	up-regulated
Nrxn1	droplet-Pancreas	up-regulated
Dync2h1	droplet-Pancreas	up-regulated
Syne1	droplet-Pancreas	up-regulated
Rnf214	droplet-Pancreas	up-regulated
Synrg	droplet-Pancreas	up-regulated
Fgf9	droplet-Pancreas	up-regulated
Ssfa2	droplet-Pancreas	up-regulated
Ldlr	droplet-Pancreas	up-regulated
Ncoa2	droplet-Pancreas	up-regulated
Cadps	droplet-Pancreas	up-regulated
Usp22	droplet-Pancreas	up-regulated
Zfp800	droplet-Pancreas	up-regulated
Gpd2	droplet-Pancreas	up-regulated
Lgi1	droplet-Pancreas	up-regulated
Atn1	droplet-Pancreas	up-regulated
Dcxr	droplet-Pancreas	up-regulated
Xrn1	droplet-Pancreas	up-regulated
Rad51ap2	droplet-Pancreas	up-regulated
Hmgcr	droplet-Pancreas	up-regulated
Ccnt2	droplet-Pancreas	up-regulated
Ccnt1	droplet-Pancreas	up-regulated
2810046L04Rik	droplet-Pancreas	up-regulated
A630007B06Rik	droplet-Pancreas	up-regulated
Scn8a	droplet-Pancreas	up-regulated
Suv420h1	droplet-Pancreas	up-regulated
Npas4	droplet-Pancreas	up-regulated
Zc3h13	droplet-Pancreas	up-regulated
Irs2	droplet-Pancreas	up-regulated
Zc3h6	droplet-Pancreas	up-regulated
Wdr89	droplet-Skin	down-regulated
Rps15a-ps6	droplet-Skin	down-regulated
A730098P11Rik	droplet-Skin	down-regulated
Gm6402	droplet-Skin	down-regulated
Rnaset2b	droplet-Skin	down-regulated
Rpl31-ps12	droplet-Skin	down-regulated
Gm1821	droplet-Skin	down-regulated
Mir703	droplet-Skin	down-regulated
Fam100b	droplet-Skin	down-regulated
Gm12504	droplet-Skin	down-regulated
Gm15421	droplet-Skin	down-regulated
Gm9320	droplet-Skin	down-regulated
Ddr2	droplet-Skin	down-regulated
Rpl34-ps1	droplet-Skin	down-regulated
Vim	droplet-Skin	down-regulated
Hk2	droplet-Skin	down-regulated
Cebpd	droplet-Skin	down-regulated
Tpm2	droplet-Skin	down-regulated
Gm6222	droplet-Skin	down-regulated
Car12	droplet-Skin	down-regulated
Lgals1	droplet-Skin	down-regulated
Glul	droplet-Skin	down-regulated
Rn45s	droplet-Skin	down-regulated
Lrrc58	droplet-Skin	down-regulated
Gm6654	droplet-Skin	down-regulated
Gm3219	droplet-Skin	down-regulated
Mrpl15	droplet-Skin	down-regulated
Lypla1	droplet-Skin	down-regulated
Tcea1	droplet-Skin	down-regulated
Rgs20	droplet-Skin	down-regulated
Atp6v1h	droplet-Skin	down-regulated
Rb1cc1	droplet-Skin	down-regulated
Pcmtd1	droplet-Skin	down-regulated
Rrs1	droplet-Skin	down-regulated
Vcpip1	droplet-Skin	down-regulated
Sgk3	droplet-Skin	down-regulated
Snhg6	droplet-Skin	down-regulated
Cops5	droplet-Skin	down-regulated
Cspp1	droplet-Skin	down-regulated
Terf1	droplet-Skin	down-regulated
Actr1b	droplet-Skin	down-regulated
Eif5b	droplet-Skin	down-regulated
Map4k4	droplet-Skin	down-regulated
Mrps9	droplet-Skin	down-regulated
Tpp2	droplet-Skin	down-regulated
Ercc5	droplet-Skin	down-regulated
Stat1	droplet-Skin	down-regulated
Hspd1	droplet-Skin	down-regulated
Sumo1	droplet-Skin	down-regulated
Nop58	droplet-Skin	down-regulated
Tspan3	droplet-Skin	up-regulated
Gadl1	droplet-Skin	up-regulated
Xist	droplet-Skin	up-regulated
Glo1	droplet-Skin	up-regulated
Sra1	droplet-Skin	up-regulated
Nhp2	droplet-Skin	up-regulated
2810474O19Rik	droplet-Skin	up-regulated
Ndufv3	droplet-Skin	up-regulated
Ndufs7	droplet-Skin	up-regulated
Aldh3b2	droplet-Skin	up-regulated
Rpl7	droplet-Skin	up-regulated
Clpx	droplet-Skin	up-regulated
Atp5o	droplet-Skin	up-regulated
Rpl22l1	droplet-Skin	up-regulated
Nop10	droplet-Skin	up-regulated
Krt16	droplet-Skin	up-regulated
Higd2a	droplet-Skin	up-regulated
Btg2	droplet-Skin	up-regulated
Rpl10	droplet-Skin	up-regulated
Rpl9	droplet-Skin	up-regulated
Atxn7l3b	droplet-Skin	up-regulated
Rpl4	droplet-Skin	up-regulated
Pomp	droplet-Skin	up-regulated
Rps3a	droplet-Skin	up-regulated
Rps27l	droplet-Skin	up-regulated
H3f3a	droplet-Skin	up-regulated
Eef1g	droplet-Skin	up-regulated
Rps27a	droplet-Skin	up-regulated
Eef1d	droplet-Skin	up-regulated
Pfdn5	droplet-Skin	up-regulated
Rpl19	droplet-Skin	up-regulated
Sub1	droplet-Skin	up-regulated
Rpl5	droplet-Skin	up-regulated
Rps3	droplet-Skin	up-regulated
Gnb2l1	droplet-Skin	up-regulated
Hccs	droplet-Skin	up-regulated
Rbbp7	droplet-Skin	up-regulated
Prps1	droplet-Skin	up-regulated
Rps6ka6	droplet-Skin	up-regulated
Atp7a	droplet-Skin	up-regulated
Rps4x	droplet-Skin	up-regulated
Taf1	droplet-Skin	up-regulated
Il2rg	droplet-Skin	up-regulated
Foxo4	droplet-Skin	up-regulated
Ar	droplet-Skin	up-regulated
Msn	droplet-Skin	up-regulated
Eif2s3x	droplet-Skin	up-regulated
Pola1	droplet-Skin	up-regulated
Dmd	droplet-Skin	up-regulated
Tbl1x	droplet-Skin	up-regulated
Lef1	droplet-Spleen	down-regulated
Ddit4	droplet-Spleen	down-regulated
Pik3ip1	droplet-Spleen	down-regulated
Rapgef4	droplet-Spleen	down-regulated
Pydc4	droplet-Spleen	down-regulated
Edaradd	droplet-Spleen	down-regulated
1700030K09Rik	droplet-Spleen	down-regulated
Gramd1a	droplet-Spleen	down-regulated
Mtmr4	droplet-Spleen	down-regulated
Mdm4	droplet-Spleen	down-regulated
Pacsin1	droplet-Spleen	down-regulated
BC094916	droplet-Spleen	down-regulated
Actn1	droplet-Spleen	down-regulated
Fam78a	droplet-Spleen	down-regulated
Erbb2ip	droplet-Spleen	down-regulated
Abl2	droplet-Spleen	down-regulated
Tsc22d3	droplet-Spleen	down-regulated
D19Wsu162e	droplet-Spleen	down-regulated
Zfp36l2	droplet-Spleen	down-regulated
2023-03-07	droplet-Spleen	down-regulated
Dusp6	droplet-Spleen	down-regulated
Esyt2	droplet-Spleen	down-regulated
Wibg	droplet-Spleen	down-regulated
Stat6	droplet-Spleen	down-regulated
Sesn1	droplet-Spleen	down-regulated
Zfp64	droplet-Spleen	down-regulated
Bcar3	droplet-Spleen	down-regulated
BC028528	droplet-Spleen	down-regulated
Zfp688	droplet-Spleen	down-regulated
Klraq1	droplet-Spleen	down-regulated
Tmub1	droplet-Spleen	down-regulated
Satb1	droplet-Spleen	down-regulated
Opa1	droplet-Spleen	down-regulated
Gdi1	droplet-Spleen	down-regulated
Igf2bp3	droplet-Spleen	down-regulated
Bcl2l11	droplet-Spleen	down-regulated
Lats1	droplet-Spleen	down-regulated
Anapc4	droplet-Spleen	down-regulated
4933439F18Rik	droplet-Spleen	down-regulated
Rbm15	droplet-Spleen	down-regulated
Acyp1	droplet-Spleen	down-regulated
Pydc3	droplet-Spleen	down-regulated
Foxo1	droplet-Spleen	down-regulated
B3galt4	droplet-Spleen	down-regulated
Cat	droplet-Spleen	down-regulated
Rabggta	droplet-Spleen	down-regulated
Polg	droplet-Spleen	down-regulated
Bbc3	droplet-Spleen	down-regulated
Mtap4	droplet-Spleen	down-regulated
Ehmt1	droplet-Spleen	down-regulated
Ankrd37	droplet-Spleen	up-regulated
Csprs	droplet-Spleen	up-regulated
Eif2s3y	droplet-Spleen	up-regulated
Fcgrt	droplet-Spleen	up-regulated
Cirbp	droplet-Spleen	up-regulated
Vopp1	droplet-Spleen	up-regulated
Cxcr4	droplet-Spleen	up-regulated
Casp1	droplet-Spleen	up-regulated
Socs3	droplet-Spleen	up-regulated
A530032D15Rik	droplet-Spleen	up-regulated
Pura	droplet-Spleen	up-regulated
Bcl2l1	droplet-Spleen	up-regulated
Mfsd4	droplet-Spleen	up-regulated
Gm7609	droplet-Spleen	up-regulated
Tifa	droplet-Spleen	up-regulated
Notch1	droplet-Spleen	up-regulated
Pisd-ps3	droplet-Spleen	up-regulated
D4Wsu53e	droplet-Spleen	up-regulated
Ccr6	droplet-Spleen	up-regulated
Slfn5	droplet-Spleen	up-regulated
N4bp1	droplet-Spleen	up-regulated
Nudcd3	droplet-Spleen	up-regulated
2310010J17Rik	droplet-Spleen	up-regulated
Gm6377	droplet-Spleen	up-regulated
Pot1b	droplet-Spleen	up-regulated
4933411K20Rik	droplet-Spleen	up-regulated
Trim44	droplet-Spleen	up-regulated
Cxcr3	droplet-Spleen	up-regulated
Gimap7	droplet-Spleen	up-regulated
Mxi1	droplet-Spleen	up-regulated
Pggt1b	droplet-Spleen	up-regulated
Rab11fip2	droplet-Spleen	up-regulated
BC021614	droplet-Spleen	up-regulated
Pltp	droplet-Spleen	up-regulated
Trex1	droplet-Spleen	up-regulated
Slc38a2	droplet-Spleen	up-regulated
Gm8369	droplet-Spleen	up-regulated
Abhd14b	droplet-Spleen	up-regulated
Zmpste24	droplet-Spleen	up-regulated
Ada	droplet-Spleen	up-regulated
Yy1	droplet-Spleen	up-regulated
Rock2	droplet-Spleen	up-regulated
Zdhhc18	droplet-Spleen	up-regulated
Fam55c	droplet-Spleen	up-regulated
Lrrk2	droplet-Spleen	up-regulated
6430527G18Rik	droplet-Spleen	up-regulated
Asb13	droplet-Spleen	up-regulated
Pde7a	droplet-Spleen	up-regulated
Pisd-ps1	droplet-Spleen	up-regulated
Stat3	droplet-Spleen	up-regulated
Gm12657	droplet-Thymus	down-regulated
Gm3258	droplet-Thymus	down-regulated
Gm5506	droplet-Thymus	down-regulated
Trat1	droplet-Thymus	down-regulated
Leprel4	droplet-Thymus	down-regulated
Tcf7	droplet-Thymus	down-regulated
Ndufs5	droplet-Thymus	down-regulated
Gm6251	droplet-Thymus	down-regulated
Fgf13	droplet-Thymus	down-regulated
AW209491	droplet-Thymus	down-regulated
Gm6654	droplet-Thymus	down-regulated
Gm6222	droplet-Thymus	down-regulated
Rasgrp1	droplet-Thymus	down-regulated
Supv3l1	droplet-Thymus	down-regulated
Lrrc58	droplet-Thymus	down-regulated
Tmem149	droplet-Thymus	down-regulated
Xlr4a	droplet-Thymus	down-regulated
Tob1	droplet-Thymus	down-regulated
Uchl4	droplet-Thymus	down-regulated
Gbp6	droplet-Thymus	down-regulated
Tab1	droplet-Thymus	down-regulated
Slc43a2	droplet-Thymus	down-regulated
Mllt11	droplet-Thymus	down-regulated
Prdm4	droplet-Thymus	down-regulated
Rgs2	droplet-Thymus	down-regulated
Drosha	droplet-Thymus	down-regulated
Csad	droplet-Thymus	down-regulated
Tgfbr1	droplet-Thymus	down-regulated
Fastkd3	droplet-Thymus	down-regulated
Taf9b	droplet-Thymus	down-regulated
Art1	droplet-Thymus	down-regulated
B3galt6	droplet-Thymus	down-regulated
Cpt1a	droplet-Thymus	down-regulated
Gm9320	droplet-Thymus	down-regulated
Wdr78	droplet-Thymus	down-regulated
Mbd6	droplet-Thymus	down-regulated
Slc1a5	droplet-Thymus	down-regulated
Gm1821	droplet-Thymus	down-regulated
Fmnl1	droplet-Thymus	down-regulated
D4Wsu53e	droplet-Thymus	down-regulated
2700007P21Rik	droplet-Thymus	down-regulated
Slain1	droplet-Thymus	down-regulated
Tufm	droplet-Thymus	down-regulated
1810026B05Rik	droplet-Thymus	down-regulated
Zfp524	droplet-Thymus	down-regulated
Carhsp1	droplet-Thymus	down-regulated
Rfwd2	droplet-Thymus	down-regulated
Ak3	droplet-Thymus	down-regulated
Pydc3	droplet-Thymus	down-regulated
Cdkal1	droplet-Thymus	down-regulated
Cma1	droplet-Thymus	up-regulated
Eif2s3y	droplet-Thymus	up-regulated
Cd55	droplet-Thymus	up-regulated
Ddx3y	droplet-Thymus	up-regulated
Socs3	droplet-Thymus	up-regulated
Rnf10	droplet-Thymus	up-regulated
Icosl	droplet-Thymus	up-regulated
Wnt8b	droplet-Thymus	up-regulated
Phf1	droplet-Thymus	up-regulated
Cirbp	droplet-Thymus	up-regulated
Notch2	droplet-Thymus	up-regulated
Mlycd	droplet-Thymus	up-regulated
Vpreb3	droplet-Thymus	up-regulated
Slx1b	droplet-Thymus	up-regulated
3110062M04Rik	droplet-Thymus	up-regulated
Kif2c	droplet-Thymus	up-regulated
Bcl3	droplet-Thymus	up-regulated
Leng9	droplet-Thymus	up-regulated
Gpsm2	droplet-Thymus	up-regulated
Zbp1	droplet-Thymus	up-regulated
Rbm3	droplet-Thymus	up-regulated
Cep250	droplet-Thymus	up-regulated
Zc3h12d	droplet-Thymus	up-regulated
Nek2	droplet-Thymus	up-regulated
Tmem120a	droplet-Thymus	up-regulated
Izumo4	droplet-Thymus	up-regulated
Comt	droplet-Thymus	up-regulated
Pacsin2	droplet-Thymus	up-regulated
Gpr162	droplet-Thymus	up-regulated
Arhgap31	droplet-Thymus	up-regulated
Txnip	droplet-Thymus	up-regulated
Slc7a5	droplet-Thymus	up-regulated
Atxn3	droplet-Thymus	up-regulated
Gfi1	droplet-Thymus	up-regulated
Yipf1	droplet-Thymus	up-regulated
Fbxo4	droplet-Thymus	up-regulated
Erdr1	droplet-Thymus	up-regulated
Dennd2d	droplet-Thymus	up-regulated
Shkbp1	droplet-Thymus	up-regulated
Snx2	droplet-Thymus	up-regulated
Btbd9	droplet-Thymus	up-regulated
Zc3h6	droplet-Thymus	up-regulated
Pdia3	droplet-Thymus	up-regulated
Mlh1	droplet-Thymus	up-regulated
Stat3	droplet-Thymus	up-regulated
Dgat1	droplet-Thymus	up-regulated
Jun	droplet-Thymus	up-regulated
Nr2c2	droplet-Thymus	up-regulated
Atf7ip	droplet-Thymus	up-regulated
Xpo7	droplet-Thymus	up-regulated
Wdfy1	droplet-Tongue	down-regulated
Lipo1	droplet-Tongue	down-regulated
Cox6b2	droplet-Tongue	down-regulated
Tef	droplet-Tongue	down-regulated
Per3	droplet-Tongue	down-regulated
Dbp	droplet-Tongue	down-regulated
Rps4y2	droplet-Tongue	down-regulated
Tmem30b	droplet-Tongue	down-regulated
Cdk5rap1	droplet-Tongue	down-regulated
Nr1d2	droplet-Tongue	down-regulated
Map4k1	droplet-Tongue	down-regulated
Gm12657	droplet-Tongue	down-regulated
Nos1ap	droplet-Tongue	down-regulated
Mib2	droplet-Tongue	down-regulated
Trim32	droplet-Tongue	down-regulated
Smoc2	droplet-Tongue	down-regulated
Atp6v0e2	droplet-Tongue	down-regulated
Nipsnap1	droplet-Tongue	down-regulated
Mical3	droplet-Tongue	down-regulated
Wipi1	droplet-Tongue	down-regulated
Col4a5	droplet-Tongue	down-regulated
Atm	droplet-Tongue	down-regulated
Nr1d1	droplet-Tongue	down-regulated
Tut1	droplet-Tongue	down-regulated
Syngr1	droplet-Tongue	down-regulated
Zbed6	droplet-Tongue	down-regulated
Tbrg3	droplet-Tongue	down-regulated
Pura	droplet-Tongue	down-regulated
Rbm19	droplet-Tongue	down-regulated
Cdkn1c	droplet-Tongue	down-regulated
Ppic	droplet-Tongue	down-regulated
Rem2	droplet-Tongue	down-regulated
Btbd9	droplet-Tongue	down-regulated
Ngfr	droplet-Tongue	down-regulated
Fam149b	droplet-Tongue	down-regulated
Matn2	droplet-Tongue	down-regulated
Nt5c2	droplet-Tongue	down-regulated
Nup155	droplet-Tongue	down-regulated
Cnn3	droplet-Tongue	down-regulated
Crls1	droplet-Tongue	down-regulated
Frat1	droplet-Tongue	down-regulated
Dhx37	droplet-Tongue	down-regulated
2310037I24Rik	droplet-Tongue	down-regulated
Tnfsf9	droplet-Tongue	down-regulated
Urb1	droplet-Tongue	down-regulated
Ccne1	droplet-Tongue	down-regulated
Ankrd27	droplet-Tongue	down-regulated
Rras2	droplet-Tongue	down-regulated
Pappa	droplet-Tongue	down-regulated
Arhgap18	droplet-Tongue	down-regulated
Casp4	droplet-Tongue	up-regulated
Amhr2	droplet-Tongue	up-regulated
Cyp7b1	droplet-Tongue	up-regulated
Nudt22	droplet-Tongue	up-regulated
Slc16a3	droplet-Tongue	up-regulated
Bhlhe22	droplet-Tongue	up-regulated
Ncoa7	droplet-Tongue	up-regulated
Trpm4	droplet-Tongue	up-regulated
Hsd3b7	droplet-Tongue	up-regulated
Rorc	droplet-Tongue	up-regulated
Prss16	droplet-Tongue	up-regulated
Tmem64	droplet-Tongue	up-regulated
Cdkn1b	droplet-Tongue	up-regulated
Efemp1	droplet-Tongue	up-regulated
Zfp395	droplet-Tongue	up-regulated
Sema4b	droplet-Tongue	up-regulated
Arntl	droplet-Tongue	up-regulated
Tgfb2	droplet-Tongue	up-regulated
Cry1	droplet-Tongue	up-regulated
Pisd-ps3	droplet-Tongue	up-regulated
Fas	droplet-Tongue	up-regulated
Snhg9	droplet-Tongue	up-regulated
Osmr	droplet-Tongue	up-regulated
BC024479	droplet-Tongue	up-regulated
Cthrc1	droplet-Tongue	up-regulated
Tns3	droplet-Tongue	up-regulated
Twf2	droplet-Tongue	up-regulated
Efcab4a	droplet-Tongue	up-regulated
Irf9	droplet-Tongue	up-regulated
Gpc1	droplet-Tongue	up-regulated
Zfp932	droplet-Tongue	up-regulated
D3Bwg0562e	droplet-Tongue	up-regulated
Hspg2	droplet-Tongue	up-regulated
Ttc21a	droplet-Tongue	up-regulated
Ass1	droplet-Tongue	up-regulated
Pvr	droplet-Tongue	up-regulated
Plac9	droplet-Tongue	up-regulated
Gsta3	droplet-Tongue	up-regulated
Insl6	droplet-Tongue	up-regulated
Sox13	droplet-Tongue	up-regulated
E2f1	droplet-Tongue	up-regulated
Pdk1	droplet-Tongue	up-regulated
Pml	droplet-Tongue	up-regulated
Cdkn2b	droplet-Tongue	up-regulated
Stbd1	droplet-Tongue	up-regulated
Pold1	droplet-Tongue	up-regulated
Khsrp	droplet-Tongue	up-regulated
Lime1	droplet-Tongue	up-regulated
Lars2	droplet-Tongue	up-regulated
Zc3h6	droplet-Tongue	up-regulated
Iapp	facs-Aorta	down-regulated
Ins2	facs-Aorta	down-regulated
Lars2	facs-Aorta	down-regulated
0610007C21Rik	facs-Aorta	down-regulated
0610007L01Rik	facs-Aorta	down-regulated
0610007N19Rik	facs-Aorta	down-regulated
0610007P08Rik	facs-Aorta	down-regulated
0610007P14Rik	facs-Aorta	down-regulated
0610007P22Rik	facs-Aorta	down-regulated
0610009B22Rik	facs-Aorta	down-regulated
0610009D07Rik	facs-Aorta	down-regulated
0610009O20Rik	facs-Aorta	down-regulated
0610010F05Rik	facs-Aorta	down-regulated
0610010K14Rik	facs-Aorta	down-regulated
0610010O12Rik	facs-Aorta	down-regulated
0610011F06Rik	facs-Aorta	down-regulated
0610011L14Rik	facs-Aorta	down-regulated
0610012G03Rik	facs-Aorta	down-regulated
0610030E20Rik	facs-Aorta	down-regulated
0610031J06Rik	facs-Aorta	down-regulated
0610037L13Rik	facs-Aorta	down-regulated
0610037P05Rik	facs-Aorta	down-regulated
0910001L09Rik	facs-Aorta	down-regulated
100043387	facs-Aorta	down-regulated
1110001A16Rik	facs-Aorta	down-regulated
1110001J03Rik	facs-Aorta	down-regulated
1110002B05Rik	facs-Aorta	down-regulated
1110003E01Rik	facs-Aorta	down-regulated
1110004E09Rik	facs-Aorta	down-regulated
1110004F10Rik	facs-Aorta	down-regulated
1110005A03Rik	facs-Aorta	down-regulated
1110007C09Rik	facs-Aorta	down-regulated
1110008F13Rik	facs-Aorta	down-regulated
1110008J03Rik	facs-Aorta	down-regulated
1110008P14Rik	facs-Aorta	down-regulated
1110012L19Rik	facs-Aorta	down-regulated
1110014N23Rik	facs-Aorta	down-regulated
1110018G07Rik	facs-Aorta	down-regulated
1110018J18Rik	facs-Aorta	down-regulated
1110020G09Rik	facs-Aorta	down-regulated
1110021J02Rik	facs-Aorta	down-regulated
1110021L09Rik	facs-Aorta	down-regulated
1110028C15Rik	facs-Aorta	down-regulated
1110031I02Rik	facs-Aorta	down-regulated
1110032A03Rik	facs-Aorta	down-regulated
1110034G24Rik	facs-Aorta	down-regulated
1110037F02Rik	facs-Aorta	down-regulated
1110038B12Rik	facs-Aorta	down-regulated
1110038D17Rik	facs-Aorta	down-regulated
1110038F14Rik	facs-Aorta	down-regulated
Krt14	facs-Aorta	up-regulated
Aes	facs-Aorta	up-regulated
Mylip	facs-Aorta	up-regulated
Rpl13a	facs-Aorta	up-regulated
Ppp1r2	facs-Aorta	up-regulated
Sepw1	facs-Aorta	up-regulated
Rhob	facs-Aorta	up-regulated
Jund	facs-Aorta	up-regulated
Gnb1	facs-Aorta	up-regulated
Epas1	facs-Aorta	up-regulated
Tpt1	facs-Aorta	up-regulated
Klf13	facs-Aorta	up-regulated
Car4	facs-Aorta	up-regulated
Ece1	facs-Aorta	up-regulated
Dhrs3	facs-Aorta	up-regulated
Lrrc8a	facs-Aorta	up-regulated
Cyr61	facs-Aorta	up-regulated
Igfbp7	facs-Aorta	up-regulated
Sparcl1	facs-Aorta	up-regulated
Zzz3	facs-Aorta	up-regulated
Zzef1	facs-Aorta	up-regulated
Zyx	facs-Aorta	up-regulated
Zyg11b	facs-Aorta	up-regulated
Zxdc	facs-Aorta	up-regulated
Zwint	facs-Aorta	up-regulated
Zw10	facs-Aorta	up-regulated
Zufsp	facs-Aorta	up-regulated
Zswim7	facs-Aorta	up-regulated
Zswim6	facs-Aorta	up-regulated
Zswim4	facs-Aorta	up-regulated
Zswim1	facs-Aorta	up-regulated
Zscan29	facs-Aorta	up-regulated
Zscan22	facs-Aorta	up-regulated
Zscan21	facs-Aorta	up-regulated
Zrsr2	facs-Aorta	up-regulated
Zrsr1	facs-Aorta	up-regulated
Zranb2	facs-Aorta	up-regulated
Zranb1	facs-Aorta	up-regulated
Znrf3	facs-Aorta	up-regulated
Znrf2	facs-Aorta	up-regulated
Znrf1	facs-Aorta	up-regulated
Znrd1	facs-Aorta	up-regulated
Znhit6	facs-Aorta	up-regulated
Znhit3	facs-Aorta	up-regulated
Znhit2-ps	facs-Aorta	up-regulated
Znhit1	facs-Aorta	up-regulated
Znfx1	facs-Aorta	up-regulated
Znf512b	facs-Aorta	up-regulated
Zmynd8	facs-Aorta	up-regulated
Zmynd19	facs-Aorta	up-regulated
0610007C21Rik	facs-BAT	down-regulated
0610007L01Rik	facs-BAT	down-regulated
0610007N19Rik	facs-BAT	down-regulated
0610007P08Rik	facs-BAT	down-regulated
0610007P14Rik	facs-BAT	down-regulated
0610007P22Rik	facs-BAT	down-regulated
0610009B22Rik	facs-BAT	down-regulated
0610009D07Rik	facs-BAT	down-regulated
0610009O20Rik	facs-BAT	down-regulated
0610010F05Rik	facs-BAT	down-regulated
0610010K14Rik	facs-BAT	down-regulated
0610010O12Rik	facs-BAT	down-regulated
0610011F06Rik	facs-BAT	down-regulated
0610011L14Rik	facs-BAT	down-regulated
0610012G03Rik	facs-BAT	down-regulated
0610030E20Rik	facs-BAT	down-regulated
0610031J06Rik	facs-BAT	down-regulated
0610037L13Rik	facs-BAT	down-regulated
0610037P05Rik	facs-BAT	down-regulated
0910001L09Rik	facs-BAT	down-regulated
1100001G20Rik	facs-BAT	down-regulated
1110001A16Rik	facs-BAT	down-regulated
1110001J03Rik	facs-BAT	down-regulated
1110002B05Rik	facs-BAT	down-regulated
1110003E01Rik	facs-BAT	down-regulated
1110004E09Rik	facs-BAT	down-regulated
1110004F10Rik	facs-BAT	down-regulated
1110005A03Rik	facs-BAT	down-regulated
1110007C09Rik	facs-BAT	down-regulated
1110008F13Rik	facs-BAT	down-regulated
1110008P14Rik	facs-BAT	down-regulated
1110012L19Rik	facs-BAT	down-regulated
1110014N23Rik	facs-BAT	down-regulated
1110018G07Rik	facs-BAT	down-regulated
1110018J18Rik	facs-BAT	down-regulated
1110021J02Rik	facs-BAT	down-regulated
1110028C15Rik	facs-BAT	down-regulated
1110031I02Rik	facs-BAT	down-regulated
1110032A03Rik	facs-BAT	down-regulated
1110032A04Rik	facs-BAT	down-regulated
1110034G24Rik	facs-BAT	down-regulated
1110037F02Rik	facs-BAT	down-regulated
1110038B12Rik	facs-BAT	down-regulated
1110038D17Rik	facs-BAT	down-regulated
A130040M12Rik	facs-BAT	down-regulated
Abca1	facs-BAT	down-regulated
Abcc5	facs-BAT	down-regulated
Abl1	facs-BAT	down-regulated
Acat1	facs-BAT	down-regulated
Acd	facs-BAT	down-regulated
Zzz3	facs-BAT	up-regulated
Zzef1	facs-BAT	up-regulated
Zyx	facs-BAT	up-regulated
Zyg11b	facs-BAT	up-regulated
Zxdc	facs-BAT	up-regulated
Zwint	facs-BAT	up-regulated
Zufsp	facs-BAT	up-regulated
Zswim7	facs-BAT	up-regulated
Zswim6	facs-BAT	up-regulated
Zswim4	facs-BAT	up-regulated
Zscan21	facs-BAT	up-regulated
Zrsr2	facs-BAT	up-regulated
Zranb2	facs-BAT	up-regulated
Zranb1	facs-BAT	up-regulated
Znrf3	facs-BAT	up-regulated
Znrf2	facs-BAT	up-regulated
Znrf1	facs-BAT	up-regulated
Znrd1	facs-BAT	up-regulated
Znhit6	facs-BAT	up-regulated
Znhit3	facs-BAT	up-regulated
Znhit2-ps	facs-BAT	up-regulated
Znhit1	facs-BAT	up-regulated
Zmynd11	facs-BAT	up-regulated
Zmpste24	facs-BAT	up-regulated
Zmiz1	facs-BAT	up-regulated
Zkscan3	facs-BAT	up-regulated
Zfp622	facs-BAT	up-regulated
Zfp277	facs-BAT	up-regulated
Zfp217	facs-BAT	up-regulated
Zfp148	facs-BAT	up-regulated
Zfand2b	facs-BAT	up-regulated
Zdhhc17	facs-BAT	up-regulated
Zcchc6	facs-BAT	up-regulated
Zbtb7a	facs-BAT	up-regulated
Yy1	facs-BAT	up-regulated
Ywhaz	facs-BAT	up-regulated
Ywhae	facs-BAT	up-regulated
Ypel3	facs-BAT	up-regulated
Ybx1	facs-BAT	up-regulated
Yars2	facs-BAT	up-regulated
Xrn1	facs-BAT	up-regulated
Xrcc6	facs-BAT	up-regulated
Xpot	facs-BAT	up-regulated
Xpa	facs-BAT	up-regulated
Xdh	facs-BAT	up-regulated
Wwp1	facs-BAT	up-regulated
Wrn	facs-BAT	up-regulated
Wipi2	facs-BAT	up-regulated
Wipf1	facs-BAT	up-regulated
Wdr5	facs-BAT	up-regulated
Mir703	facs-Bladder	down-regulated
Gstm3	facs-Bladder	down-regulated
Gm6623	facs-Bladder	down-regulated
Gm13034	facs-Bladder	down-regulated
Srp54a	facs-Bladder	down-regulated
2010003O02Rik	facs-Bladder	down-regulated
Cbx3	facs-Bladder	down-regulated
Chsy3	facs-Bladder	down-regulated
Rps29	facs-Bladder	down-regulated
Tsix	facs-Bladder	down-regulated
Fam199x	facs-Bladder	down-regulated
Gm20199	facs-Bladder	down-regulated
1810027O10Rik	facs-Bladder	down-regulated
1810006K21Rik	facs-Bladder	down-regulated
Dynlt1b	facs-Bladder	down-regulated
Zfp775	facs-Bladder	down-regulated
Krtdap	facs-Bladder	down-regulated
Defb1	facs-Bladder	down-regulated
Zfp788	facs-Bladder	down-regulated
Bola2	facs-Bladder	down-regulated
Eif2ak3	facs-Bladder	down-regulated
Setx	facs-Bladder	down-regulated
Cep68	facs-Bladder	down-regulated
Col5a2	facs-Bladder	down-regulated
Rpl39	facs-Bladder	down-regulated
Slc35d2	facs-Bladder	down-regulated
Rbm15b	facs-Bladder	down-regulated
Epb4.1l3	facs-Bladder	down-regulated
Parg	facs-Bladder	down-regulated
Scube2	facs-Bladder	down-regulated
Lars2	facs-Bladder	down-regulated
Rnpepl1	facs-Bladder	down-regulated
Dhx9	facs-Bladder	down-regulated
Rbx1	facs-Bladder	down-regulated
Ankrd13a	facs-Bladder	down-regulated
Ext1	facs-Bladder	down-regulated
Dyrk2	facs-Bladder	down-regulated
Sec61g	facs-Bladder	down-regulated
Hist1h1e	facs-Bladder	down-regulated
Atp5k	facs-Bladder	down-regulated
Ndufa3	facs-Bladder	down-regulated
Iqcb1	facs-Bladder	down-regulated
Rps21	facs-Bladder	down-regulated
Csde1	facs-Bladder	down-regulated
Jak2	facs-Bladder	down-regulated
2010107E04Rik	facs-Bladder	down-regulated
Eif3b	facs-Bladder	down-regulated
Tomm7	facs-Bladder	down-regulated
Dnm1l	facs-Bladder	down-regulated
Ctnnb1	facs-Bladder	down-regulated
Npm3-ps1	facs-Bladder	up-regulated
4930413G21Rik	facs-Bladder	up-regulated
Rpl31-ps12	facs-Bladder	up-regulated
Crlf2	facs-Bladder	up-regulated
H2-Q8	facs-Bladder	up-regulated
Tmsb10	facs-Bladder	up-regulated
Snrpc	facs-Bladder	up-regulated
Drap1	facs-Bladder	up-regulated
Hoxb8	facs-Bladder	up-regulated
Tomm6	facs-Bladder	up-regulated
Gar1	facs-Bladder	up-regulated
Aes	facs-Bladder	up-regulated
Bri3	facs-Bladder	up-regulated
Furin	facs-Bladder	up-regulated
Cadm4	facs-Bladder	up-regulated
4930526I15Rik	facs-Bladder	up-regulated
Ptms	facs-Bladder	up-regulated
Tmem160	facs-Bladder	up-regulated
A130040M12Rik	facs-Bladder	up-regulated
Grasp	facs-Bladder	up-regulated
Fuz	facs-Bladder	up-regulated
Khsrp	facs-Bladder	up-regulated
Cyfip2	facs-Bladder	up-regulated
Cnot3	facs-Bladder	up-regulated
Ino80e	facs-Bladder	up-regulated
Rpl13a	facs-Bladder	up-regulated
Obfc2b	facs-Bladder	up-regulated
Anapc11	facs-Bladder	up-regulated
Cotl1	facs-Bladder	up-regulated
Mafb	facs-Bladder	up-regulated
Cfl1	facs-Bladder	up-regulated
Tnk2	facs-Bladder	up-regulated
Map1lc3a	facs-Bladder	up-regulated
Rbm26	facs-Bladder	up-regulated
2310044H10Rik	facs-Bladder	up-regulated
Hnrnpd	facs-Bladder	up-regulated
Sdhc	facs-Bladder	up-regulated
Bsg	facs-Bladder	up-regulated
D4Ertd22e	facs-Bladder	up-regulated
Wbp2	facs-Bladder	up-regulated
Fa2h	facs-Bladder	up-regulated
Ube2m	facs-Bladder	up-regulated
Kdm6b	facs-Bladder	up-regulated
Cirbp	facs-Bladder	up-regulated
Tex261	facs-Bladder	up-regulated
Jund	facs-Bladder	up-regulated
Rxrb	facs-Bladder	up-regulated
Zmynd11	facs-Bladder	up-regulated
Zmpste24	facs-Bladder	up-regulated
Zmiz1	facs-Bladder	up-regulated
Mir703	facs-Brain_Myeloid	down-regulated
Ins2	facs-Brain_Myeloid	down-regulated
Jun	facs-Brain_Myeloid	down-regulated
0610007C21Rik	facs-Brain_Myeloid	down-regulated
0610007L01Rik	facs-Brain_Myeloid	down-regulated
0610007P14Rik	facs-Brain_Myeloid	down-regulated
0610007P22Rik	facs-Brain_Myeloid	down-regulated
0610009B22Rik	facs-Brain_Myeloid	down-regulated
0610009D07Rik	facs-Brain_Myeloid	down-regulated
0610009O20Rik	facs-Brain_Myeloid	down-regulated
0610010K14Rik	facs-Brain_Myeloid	down-regulated
0610011F06Rik	facs-Brain_Myeloid	down-regulated
0610011L14Rik	facs-Brain_Myeloid	down-regulated
0610012G03Rik	facs-Brain_Myeloid	down-regulated
0610030E20Rik	facs-Brain_Myeloid	down-regulated
0610031J06Rik	facs-Brain_Myeloid	down-regulated
0610037L13Rik	facs-Brain_Myeloid	down-regulated
0610037P05Rik	facs-Brain_Myeloid	down-regulated
0610039K10Rik	facs-Brain_Myeloid	down-regulated
0610040J01Rik	facs-Brain_Myeloid	down-regulated
0910001L09Rik	facs-Brain_Myeloid	down-regulated
1110001A16Rik	facs-Brain_Myeloid	down-regulated
1110001J03Rik	facs-Brain_Myeloid	down-regulated
1110002B05Rik	facs-Brain_Myeloid	down-regulated
1110002N22Rik	facs-Brain_Myeloid	down-regulated
1110003E01Rik	facs-Brain_Myeloid	down-regulated
1110004F10Rik	facs-Brain_Myeloid	down-regulated
1110005A03Rik	facs-Brain_Myeloid	down-regulated
1110007C09Rik	facs-Brain_Myeloid	down-regulated
1110008F13Rik	facs-Brain_Myeloid	down-regulated
1110012L19Rik	facs-Brain_Myeloid	down-regulated
1110014N23Rik	facs-Brain_Myeloid	down-regulated
1110018G07Rik	facs-Brain_Myeloid	down-regulated
1110018J18Rik	facs-Brain_Myeloid	down-regulated
1110020G09Rik	facs-Brain_Myeloid	down-regulated
1110021J02Rik	facs-Brain_Myeloid	down-regulated
1110021L09Rik	facs-Brain_Myeloid	down-regulated
1110028C15Rik	facs-Brain_Myeloid	down-regulated
1110031I02Rik	facs-Brain_Myeloid	down-regulated
1110032A03Rik	facs-Brain_Myeloid	down-regulated
1110034A24Rik	facs-Brain_Myeloid	down-regulated
1110034G24Rik	facs-Brain_Myeloid	down-regulated
1110035M17Rik	facs-Brain_Myeloid	down-regulated
1110037F02Rik	facs-Brain_Myeloid	down-regulated
1110038B12Rik	facs-Brain_Myeloid	down-regulated
1110038D17Rik	facs-Brain_Myeloid	down-regulated
1110038F14Rik	facs-Brain_Myeloid	down-regulated
1110049F12Rik	facs-Brain_Myeloid	down-regulated
1110051M20Rik	facs-Brain_Myeloid	down-regulated
1110054O05Rik	facs-Brain_Myeloid	down-regulated
Rnaset2b	facs-Brain_Myeloid	up-regulated
Arhgdia	facs-Brain_Myeloid	up-regulated
B2m	facs-Brain_Myeloid	up-regulated
Zzz3	facs-Brain_Myeloid	up-regulated
Zzef1	facs-Brain_Myeloid	up-regulated
Zyx	facs-Brain_Myeloid	up-regulated
Zyg11b	facs-Brain_Myeloid	up-regulated
Zxdc	facs-Brain_Myeloid	up-regulated
Zwint	facs-Brain_Myeloid	up-regulated
Zufsp	facs-Brain_Myeloid	up-regulated
Zswim7	facs-Brain_Myeloid	up-regulated
Zswim6	facs-Brain_Myeloid	up-regulated
Zswim4	facs-Brain_Myeloid	up-regulated
Zswim1	facs-Brain_Myeloid	up-regulated
Zscan29	facs-Brain_Myeloid	up-regulated
Zscan22	facs-Brain_Myeloid	up-regulated
Zscan21	facs-Brain_Myeloid	up-regulated
Zrsr2	facs-Brain_Myeloid	up-regulated
Zranb2	facs-Brain_Myeloid	up-regulated
Zranb1	facs-Brain_Myeloid	up-regulated
Znrf3	facs-Brain_Myeloid	up-regulated
Znrf2	facs-Brain_Myeloid	up-regulated
Znrf1	facs-Brain_Myeloid	up-regulated
Znrd1	facs-Brain_Myeloid	up-regulated
Znhit3	facs-Brain_Myeloid	up-regulated
Znhit2-ps	facs-Brain_Myeloid	up-regulated
Znhit1	facs-Brain_Myeloid	up-regulated
Znfx1	facs-Brain_Myeloid	up-regulated
Znf512b	facs-Brain_Myeloid	up-regulated
Zmynd8	facs-Brain_Myeloid	up-regulated
Zmynd11	facs-Brain_Myeloid	up-regulated
Zmym6	facs-Brain_Myeloid	up-regulated
Zmym5	facs-Brain_Myeloid	up-regulated
Zmym4	facs-Brain_Myeloid	up-regulated
Zmym3	facs-Brain_Myeloid	up-regulated
Zmym2	facs-Brain_Myeloid	up-regulated
Zmpste24	facs-Brain_Myeloid	up-regulated
Zmiz2	facs-Brain_Myeloid	up-regulated
Zmiz1	facs-Brain_Myeloid	up-regulated
Zmat5	facs-Brain_Myeloid	up-regulated
Zmat2	facs-Brain_Myeloid	up-regulated
Zmat1	facs-Brain_Myeloid	up-regulated
Zkscan6	facs-Brain_Myeloid	up-regulated
Zkscan3	facs-Brain_Myeloid	up-regulated
Zkscan17	facs-Brain_Myeloid	up-regulated
Zkscan14	facs-Brain_Myeloid	up-regulated
Zkscan1	facs-Brain_Myeloid	up-regulated
Zhx1	facs-Brain_Myeloid	up-regulated
Zgpat	facs-Brain_Myeloid	up-regulated
Zfyve27	facs-Brain_Myeloid	up-regulated
Mir703	facs-Brain_Non	down-regulated
1810030J14Rik	facs-Brain_Non	down-regulated
Gcg	facs-Brain_Non	down-regulated
Lars2	facs-Brain_Non	down-regulated
Ugt8a	facs-Brain_Non	down-regulated
Slc44a1	facs-Brain_Non	down-regulated
0610007C21Rik	facs-Brain_Non	down-regulated
0610007L01Rik	facs-Brain_Non	down-regulated
0610007N19Rik	facs-Brain_Non	down-regulated
0610007P08Rik	facs-Brain_Non	down-regulated
0610007P14Rik	facs-Brain_Non	down-regulated
0610007P22Rik	facs-Brain_Non	down-regulated
0610009B22Rik	facs-Brain_Non	down-regulated
0610009D07Rik	facs-Brain_Non	down-regulated
0610009L18Rik	facs-Brain_Non	down-regulated
0610009O20Rik	facs-Brain_Non	down-regulated
0610010F05Rik	facs-Brain_Non	down-regulated
0610010K14Rik	facs-Brain_Non	down-regulated
0610010O12Rik	facs-Brain_Non	down-regulated
0610011F06Rik	facs-Brain_Non	down-regulated
0610011L14Rik	facs-Brain_Non	down-regulated
0610012G03Rik	facs-Brain_Non	down-regulated
0610030E20Rik	facs-Brain_Non	down-regulated
0610031J06Rik	facs-Brain_Non	down-regulated
0610037L13Rik	facs-Brain_Non	down-regulated
0610037P05Rik	facs-Brain_Non	down-regulated
0610040J01Rik	facs-Brain_Non	down-regulated
0910001L09Rik	facs-Brain_Non	down-regulated
100043387	facs-Brain_Non	down-regulated
1110001A16Rik	facs-Brain_Non	down-regulated
1110001J03Rik	facs-Brain_Non	down-regulated
1110002B05Rik	facs-Brain_Non	down-regulated
1110002N22Rik	facs-Brain_Non	down-regulated
1110003E01Rik	facs-Brain_Non	down-regulated
1110004E09Rik	facs-Brain_Non	down-regulated
1110004F10Rik	facs-Brain_Non	down-regulated
1110005A03Rik	facs-Brain_Non	down-regulated
1110007C09Rik	facs-Brain_Non	down-regulated
1110008F13Rik	facs-Brain_Non	down-regulated
1110008J03Rik	facs-Brain_Non	down-regulated
1110008L16Rik	facs-Brain_Non	down-regulated
1110008P14Rik	facs-Brain_Non	down-regulated
1110012J17Rik	facs-Brain_Non	down-regulated
1110012L19Rik	facs-Brain_Non	down-regulated
1110014N23Rik	facs-Brain_Non	down-regulated
1110018G07Rik	facs-Brain_Non	down-regulated
1110018J18Rik	facs-Brain_Non	down-regulated
1110020G09Rik	facs-Brain_Non	down-regulated
1110021J02Rik	facs-Brain_Non	down-regulated
1110021L09Rik	facs-Brain_Non	down-regulated
Olfr613	facs-Brain_Non	up-regulated
Mir684-1	facs-Brain_Non	up-regulated
Pabpn1	facs-Brain_Non	up-regulated
Ptms	facs-Brain_Non	up-regulated
Ube2m	facs-Brain_Non	up-regulated
Rtf1	facs-Brain_Non	up-regulated
Rnaset2b	facs-Brain_Non	up-regulated
Camk2n1	facs-Brain_Non	up-regulated
Rps3a	facs-Brain_Non	up-regulated
Rpl13a	facs-Brain_Non	up-regulated
Scand1	facs-Brain_Non	up-regulated
Rps24	facs-Brain_Non	up-regulated
Tsix	facs-Brain_Non	up-regulated
Cfl1	facs-Brain_Non	up-regulated
Ccdc85b	facs-Brain_Non	up-regulated
Scn1b	facs-Brain_Non	up-regulated
Rpl18a	facs-Brain_Non	up-regulated
Rbm26	facs-Brain_Non	up-regulated
Rhoc	facs-Brain_Non	up-regulated
Adcy1	facs-Brain_Non	up-regulated
Gnb1	facs-Brain_Non	up-regulated
Tmsb4x	facs-Brain_Non	up-regulated
Bsg	facs-Brain_Non	up-regulated
Calm1	facs-Brain_Non	up-regulated
Zzz3	facs-Brain_Non	up-regulated
Zzef1	facs-Brain_Non	up-regulated
Zyx	facs-Brain_Non	up-regulated
Zyg11b	facs-Brain_Non	up-regulated
Zxdc	facs-Brain_Non	up-regulated
Zwint	facs-Brain_Non	up-regulated
Zw10	facs-Brain_Non	up-regulated
Zufsp	facs-Brain_Non	up-regulated
Zswim7	facs-Brain_Non	up-regulated
Zswim6	facs-Brain_Non	up-regulated
Zswim4	facs-Brain_Non	up-regulated
Zswim1	facs-Brain_Non	up-regulated
Zscan29	facs-Brain_Non	up-regulated
Zscan22	facs-Brain_Non	up-regulated
Zscan21	facs-Brain_Non	up-regulated
Zrsr2	facs-Brain_Non	up-regulated
Zrsr1	facs-Brain_Non	up-regulated
Zranb2	facs-Brain_Non	up-regulated
Zranb1	facs-Brain_Non	up-regulated
Znrf3	facs-Brain_Non	up-regulated
Znrf2	facs-Brain_Non	up-regulated
Znrf1	facs-Brain_Non	up-regulated
Znrd1	facs-Brain_Non	up-regulated
Znhit6	facs-Brain_Non	up-regulated
Znhit3	facs-Brain_Non	up-regulated
Znhit2-ps	facs-Brain_Non	up-regulated
Mir703	facs-Diaphragm	down-regulated
Gcg	facs-Diaphragm	down-regulated
Ins1	facs-Diaphragm	down-regulated
Tsix	facs-Diaphragm	down-regulated
Map3k1	facs-Diaphragm	down-regulated
Tcp11l2	facs-Diaphragm	down-regulated
Sdcbp	facs-Diaphragm	down-regulated
Golt1b	facs-Diaphragm	down-regulated
Cdv3	facs-Diaphragm	down-regulated
Dld	facs-Diaphragm	down-regulated
Ins2	facs-Diaphragm	down-regulated
2023-09-02	facs-Diaphragm	down-regulated
Dusp6	facs-Diaphragm	down-regulated
Ubc	facs-Diaphragm	down-regulated
Ptrf	facs-Diaphragm	down-regulated
Hspa8	facs-Diaphragm	down-regulated
0610007C21Rik	facs-Diaphragm	down-regulated
0610007L01Rik	facs-Diaphragm	down-regulated
0610007N19Rik	facs-Diaphragm	down-regulated
0610007P14Rik	facs-Diaphragm	down-regulated
0610007P22Rik	facs-Diaphragm	down-regulated
0610009B22Rik	facs-Diaphragm	down-regulated
0610009D07Rik	facs-Diaphragm	down-regulated
0610009O20Rik	facs-Diaphragm	down-regulated
0610010F05Rik	facs-Diaphragm	down-regulated
0610010K14Rik	facs-Diaphragm	down-regulated
0610010O12Rik	facs-Diaphragm	down-regulated
0610011F06Rik	facs-Diaphragm	down-regulated
0610011L14Rik	facs-Diaphragm	down-regulated
0610012G03Rik	facs-Diaphragm	down-regulated
0610030E20Rik	facs-Diaphragm	down-regulated
0610031J06Rik	facs-Diaphragm	down-regulated
0610037L13Rik	facs-Diaphragm	down-regulated
0610037P05Rik	facs-Diaphragm	down-regulated
0910001L09Rik	facs-Diaphragm	down-regulated
1100001G20Rik	facs-Diaphragm	down-regulated
1110001A16Rik	facs-Diaphragm	down-regulated
1110001J03Rik	facs-Diaphragm	down-regulated
1110002B05Rik	facs-Diaphragm	down-regulated
1110003E01Rik	facs-Diaphragm	down-regulated
1110004E09Rik	facs-Diaphragm	down-regulated
1110004F10Rik	facs-Diaphragm	down-regulated
1110005A03Rik	facs-Diaphragm	down-regulated
1110007C09Rik	facs-Diaphragm	down-regulated
1110008F13Rik	facs-Diaphragm	down-regulated
1110008P14Rik	facs-Diaphragm	down-regulated
1110012L19Rik	facs-Diaphragm	down-regulated
1110014N23Rik	facs-Diaphragm	down-regulated
1110018J18Rik	facs-Diaphragm	down-regulated
1110021J02Rik	facs-Diaphragm	down-regulated
Hbb-b1	facs-Diaphragm	up-regulated
Beta-s	facs-Diaphragm	up-regulated
Gm5148	facs-Diaphragm	up-regulated
A130040M12Rik	facs-Diaphragm	up-regulated
Rps27	facs-Diaphragm	up-regulated
Rps10	facs-Diaphragm	up-regulated
Rpl24	facs-Diaphragm	up-regulated
Myl6	facs-Diaphragm	up-regulated
Rpl13a	facs-Diaphragm	up-regulated
Ifitm3	facs-Diaphragm	up-regulated
Fabp4	facs-Diaphragm	up-regulated
Hmgb1	facs-Diaphragm	up-regulated
Gpx4	facs-Diaphragm	up-regulated
Rn45s	facs-Diaphragm	up-regulated
Mt1	facs-Diaphragm	up-regulated
Zzz3	facs-Diaphragm	up-regulated
Zzef1	facs-Diaphragm	up-regulated
Zyx	facs-Diaphragm	up-regulated
Zyg11b	facs-Diaphragm	up-regulated
Zxdc	facs-Diaphragm	up-regulated
Zwint	facs-Diaphragm	up-regulated
Zufsp	facs-Diaphragm	up-regulated
Zswim7	facs-Diaphragm	up-regulated
Zswim6	facs-Diaphragm	up-regulated
Zswim4	facs-Diaphragm	up-regulated
Zscan29	facs-Diaphragm	up-regulated
Zscan21	facs-Diaphragm	up-regulated
Zrsr2	facs-Diaphragm	up-regulated
Zranb2	facs-Diaphragm	up-regulated
Zranb1	facs-Diaphragm	up-regulated
Znrf3	facs-Diaphragm	up-regulated
Znrf2	facs-Diaphragm	up-regulated
Znrf1	facs-Diaphragm	up-regulated
Znrd1	facs-Diaphragm	up-regulated
Znhit6	facs-Diaphragm	up-regulated
Znhit3	facs-Diaphragm	up-regulated
Znhit2-ps	facs-Diaphragm	up-regulated
Znhit1	facs-Diaphragm	up-regulated
Znfx1	facs-Diaphragm	up-regulated
Znf512b	facs-Diaphragm	up-regulated
Zmynd8	facs-Diaphragm	up-regulated
Zmynd19	facs-Diaphragm	up-regulated
Zmynd11	facs-Diaphragm	up-regulated
Zmym5	facs-Diaphragm	up-regulated
Zmym4	facs-Diaphragm	up-regulated
Zmym2	facs-Diaphragm	up-regulated
Zmym1	facs-Diaphragm	up-regulated
Zmpste24	facs-Diaphragm	up-regulated
Zmiz2	facs-Diaphragm	up-regulated
[truncated: 1,701 more rows]
