# Supplementary figures and images for: A transcriptome-based single-cell biological age model and resource for tissue-specific aging measures
Source: HighWire-hosted journal article supplement (doi:10.1101/gr.277491.122), 2023-07-31

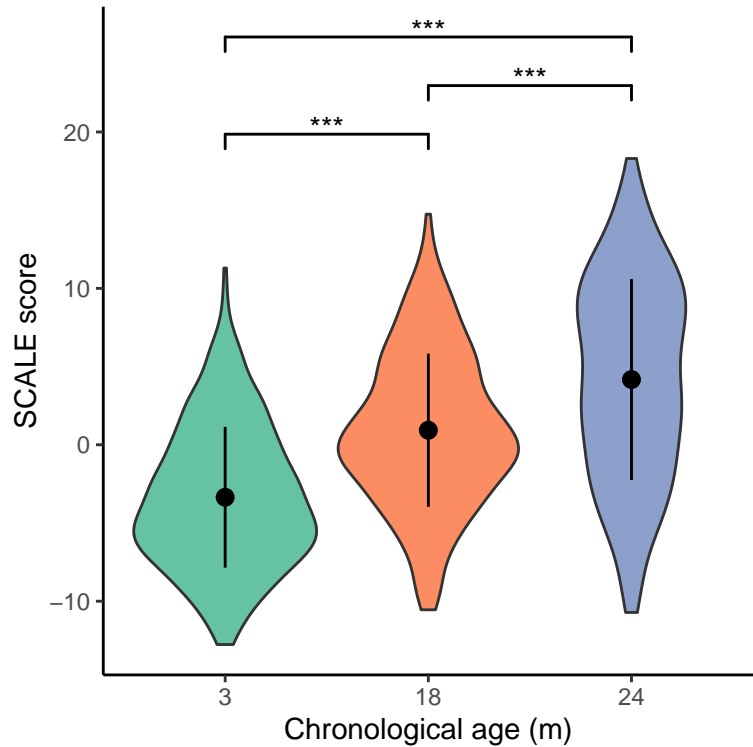

Supplement: Supplemental_Codes.zip [file facs-Aorta_SCALE_score.pdf › Supplemental_Codes/demo/figure/facs-Aorta_SCALE_score.pdf]
